# Supplementary material for: Polypyrimidine tract binding protein 1 protects mRNAs from recognition by the nonsense-mediated mRNA decay pathway
Source: eLife. 2016 Jan 8;5:e11155. doi: 10.7554/eLife.11155 (PMC4764554; doi:10.7554/eLife.11155)
Supplement: Figure 3—source data 1. — List of proteins identified in mRNP purifications of PP7-tagged mRNAs containing RSE or antisense (AS) sequence, with numbers of peptides and spectral counts derived from each protein indicated. DOI: http://dx.doi.org/10.7554/eLife.11155.010 [file elife-11155-fig3-data1.xlsx]

## Sheet: Recovered_Sheet1
RSE vs antisense (AS) ms/ms report
	Peak List Generator: unknown
		Version: unknown
		Charge States Calculated: unknown
		Deisotoped: unknown
		Textual Annotation: unknown
	Database Set: 1 Database
		Database Name: the Sprot_061312 database
			Version: unknown
			Taxonomy: Homo sapiens
			Number of Proteins: 20312
		Does database contain common contaminants?: unknown
	Search Engine Set: 1 Search Engine
		Search Engine: Mascot
			Version: 2.4.0
			Samples: All Samples
			Fragment Tolerance: 0.80 Da (Monoisotopic)
			Parent Tolerance: 20 PPM (Monoisotopic)
			Fixed Modifications: +57 on C (Carbamidomethyl)
			Variable Modifications: +16 on M (Oxidation)
			Database: the Sprot_061312 database (selected for Homo sapiens, unknown version, 20312 entries)
			Digestion Enzyme: Trypsin
			Max Missed Cleavages: 2
			Probability Model:
				File Name: BH_ASE1_718.raw (F635454): Peptide Prophet [+2 and below,+3,+4,+5,+6,+7,+8 and above]
				File Name: BH_RSEE1_718.raw (F635456): Peptide Prophet [+2 and below,+3,+4,+5,+6,+7,+8 and above]
	Scaffold: Version: Scaffold_4.3.0
		Modification Metadata Set: Unknown modifications
			Source: Unknown
			Comment:
		Protein Grouping Strategy: Experiment-wide grouping with binary peptide-protein weights
		Peptide Thresholds: 90.0% minimum
		Protein Thresholds: 90.0% minimum and 2 peptides minimum
		Peptide FDR: 0.0% (Decoy)
		Protein FDR: 0.4% (Decoy)
		GO Annotation Source(s): Unknown
Experiment name	Biological sample category	Biological sample name	MS/MS sample name	Protein name	Protein accession numbers	Database sources	Protein molecular weight (Da)	Protein identification probability	Exclusive unique peptide count	Exclusive unique spectrum count	Total spectrum count	Percentage of total spectra	Percentage sequence coverage
07202012_AS_RSE_samplecomparison	AS	AS	File Name: BH_ASE1_718.raw (F635454)	Myb-binding protein 1A	MBB1A_HUMAN	Sprot_041812.fas	148858	0.323	1	1	1	4.11e-05	0.0128
07202012_AS_RSE_samplecomparison	AS	AS	File Name: BH_ASE1_718.raw (F635454)	Nucleophosmin	NPM_HUMAN	Sprot_041812.fas	32575.5	1	7	8	15	0.000616	0.371
07202012_AS_RSE_samplecomparison	AS	AS	File Name: BH_ASE1_718.raw (F635454)	60S ribosomal protein L23a	RL23A_HUMAN	Sprot_041812.fas	17696.2	1	9	11	21	0.000862	0.449
07202012_AS_RSE_samplecomparison	AS	AS	File Name: BH_ASE1_718.raw (F635454)	Plasminogen activator inhibitor 1 RNA-binding protein	PAIRB_HUMAN	Sprot_041812.fas	44965.8	1	10	13	17	0.000698	0.341
07202012_AS_RSE_samplecomparison	AS	AS	File Name: BH_ASE1_718.raw (F635454)	Squamous cell carcinoma antigen recognized by T-cells 3	SART3_HUMAN	Sprot_041812.fas	109936	1	9	9	10	0.000411	0.147
07202012_AS_RSE_samplecomparison	AS	AS	File Name: BH_ASE1_718.raw (F635454)	40S ribosomal protein S10	RS10_HUMAN	Sprot_041812.fas	18898.3	1	9	15	27	0.00111	0.655
07202012_AS_RSE_samplecomparison	AS	AS	File Name: BH_ASE1_718.raw (F635454)	60S ribosomal protein L7	RL7_HUMAN	Sprot_041812.fas	29227.7	1	16	19	39	0.0016	0.565
07202012_AS_RSE_samplecomparison	AS	AS	File Name: BH_ASE1_718.raw (F635454)	Heat shock protein HSP 90-alpha	HS90A_HUMAN	Sprot_041812.fas	84663.2	1	3	3	4	0.000164	0.148
07202012_AS_RSE_samplecomparison	AS	AS	File Name: BH_ASE1_718.raw (F635454)	60S ribosomal protein L10	RL10_HUMAN	Sprot_041812.fas	24604.6	1	12	16	29	0.00119	0.519
07202012_AS_RSE_samplecomparison	AS	AS	File Name: BH_ASE1_718.raw (F635454)	60S acidic ribosomal protein P2	RLA2_HUMAN	Sprot_041812.fas	11665.5	1	11	13	29	0.00119	0.852
07202012_AS_RSE_samplecomparison	AS	AS	File Name: BH_ASE1_718.raw (F635454)	Heterogeneous nuclear ribonucleoprotein L	HNRPL_HUMAN	Sprot_041812.fas	64132.8	1	8	8	17	0.000698	0.27
07202012_AS_RSE_samplecomparison	AS	AS	File Name: BH_ASE1_718.raw (F635454)	Zinc finger RNA-binding protein	ZFR_HUMAN	Sprot_041812.fas	117012	1	4	4	5	0.000205	0.0605
07202012_AS_RSE_samplecomparison	AS	AS	File Name: BH_ASE1_718.raw (F635454)	L-lactate dehydrogenase B chain	LDHB_HUMAN	Sprot_041812.fas	36638.6	1	5	5	6	0.000246	0.219
07202012_AS_RSE_samplecomparison	AS	AS	File Name: BH_ASE1_718.raw (F635454)	40S ribosomal protein S29	RS29_HUMAN	Sprot_041812.fas	6676.9	1	3	3	5	0.000205	0.464
07202012_AS_RSE_samplecomparison	AS	AS	File Name: BH_ASE1_718.raw (F635454)	Regulator of nonsense transcripts 1	RENT1_HUMAN	Sprot_041812.fas	124347	1	26	31	45	0.00185	0.323
07202012_AS_RSE_samplecomparison	AS	AS	File Name: BH_ASE1_718.raw (F635454)	Eukaryotic translation initiation factor 3 subunit A	EIF3A_HUMAN	Sprot_041812.fas	166575	1	4	4	4	0.000164	0.0398
07202012_AS_RSE_samplecomparison	AS	AS	File Name: BH_ASE1_718.raw (F635454)	60S ribosomal protein L29	RL29_HUMAN	Sprot_041812.fas	17753	1	3	4	5	0.000205	0.151
07202012_AS_RSE_samplecomparison	AS	AS	File Name: BH_ASE1_718.raw (F635454)	40S ribosomal protein S3	RS3_HUMAN	Sprot_041812.fas	26688.6	1	21	24	54	0.00222	0.811
07202012_AS_RSE_samplecomparison	AS	AS	File Name: BH_ASE1_718.raw (F635454)	Interferon-inducible double stranded RNA-dependent protein kinase activator A	PRKRA_HUMAN	Sprot_041812.fas	34405.2	0.998	2	2	3	0.000123	0.137
07202012_AS_RSE_samplecomparison	AS	AS	File Name: BH_ASE1_718.raw (F635454)	Methionine--tRNA ligase, cytoplasmic	SYMC_HUMAN	Sprot_041812.fas	101118	0.997	2	2	2	8.21e-05	0.0333
07202012_AS_RSE_samplecomparison	AS	AS	File Name: BH_ASE1_718.raw (F635454)	60S ribosomal protein L7a	RL7A_HUMAN	Sprot_041812.fas	29996.3	1	17	22	43	0.00177	0.579
07202012_AS_RSE_samplecomparison	AS	AS	File Name: BH_ASE1_718.raw (F635454)	Heat shock cognate 71 kDa protein	HSP7C_HUMAN	Sprot_041812.fas	70899.8	1	23	28	44	0.00181	0.497
07202012_AS_RSE_samplecomparison	AS	AS	File Name: BH_ASE1_718.raw (F635454)	Elongation factor 1-alpha 1	EF1A1_HUMAN,EF1A3_HUMAN	Sprot_041812.fas	50141.2	1	5	6	11	0.000452	0.24
07202012_AS_RSE_samplecomparison	AS	AS	File Name: BH_ASE1_718.raw (F635454)	Heterogeneous nuclear ribonucleoprotein H	HNRH1_HUMAN	Sprot_041812.fas	49229.8	1	6	7	12	0.000493	0.185
07202012_AS_RSE_samplecomparison	AS	AS	File Name: BH_ASE1_718.raw (F635454)	Caprin-1	CAPR1_HUMAN	Sprot_041812.fas	78364.4	1	6	7	10	0.000411	0.138
07202012_AS_RSE_samplecomparison	AS	AS	File Name: BH_ASE1_718.raw (F635454)	40S ribosomal protein S19	RS19_HUMAN	Sprot_041812.fas	16060.5	1	10	14	23	0.000944	0.559
07202012_AS_RSE_samplecomparison	AS	AS	File Name: BH_ASE1_718.raw (F635454)	Heterogeneous nuclear ribonucleoprotein K	HNRPK_HUMAN	Sprot_041812.fas	50978.5	1	13	16	24	0.000985	0.346
07202012_AS_RSE_samplecomparison	AS	AS	File Name: BH_ASE1_718.raw (F635454)	Heterogeneous nuclear ribonucleoprotein U	HNRPU_HUMAN	Sprot_041812.fas	90585.2	1	28	34	63	0.00259	0.433
07202012_AS_RSE_samplecomparison	AS	AS	File Name: BH_ASE1_718.raw (F635454)	Nucleolar protein 58	NOP58_HUMAN	Sprot_041812.fas	59580.2	0.998	2	2	2	8.21e-05	0.0491
07202012_AS_RSE_samplecomparison	AS	AS	File Name: BH_ASE1_718.raw (F635454)	40S ribosomal protein S28	RS28_HUMAN	Sprot_041812.fas	7840.9	1	8	11	12	0.000493	0.725
07202012_AS_RSE_samplecomparison	AS	AS	File Name: BH_ASE1_718.raw (F635454)	Fatty acid synthase	FAS_HUMAN	Sprot_041812.fas	273427	0.5	1	1	2	8.21e-05	0.00916
07202012_AS_RSE_samplecomparison	AS	AS	File Name: BH_ASE1_718.raw (F635454)	Protein PRRC2C	PRC2C_HUMAN	Sprot_041812.fas	316908	1	17	19	29	0.00119	0.118
07202012_AS_RSE_samplecomparison	AS	AS	File Name: BH_ASE1_718.raw (F635454)	Transcription intermediary factor 1-beta	TIF1B_HUMAN	Sprot_041812.fas	88549	1	2	2	2	8.21e-05	0.0323
07202012_AS_RSE_samplecomparison	AS	AS	File Name: BH_ASE1_718.raw (F635454)	40S ribosomal protein S15a	RS15A_HUMAN	Sprot_041812.fas	14840	1	10	12	25	0.00103	0.662
07202012_AS_RSE_samplecomparison	AS	AS	File Name: BH_ASE1_718.raw (F635454)	60S ribosomal protein L18a	RL18A_HUMAN	Sprot_041812.fas	20762.6	1	13	18	34	0.0014	0.574
07202012_AS_RSE_samplecomparison	AS	AS	File Name: BH_ASE1_718.raw (F635454)	Eukaryotic peptide chain release factor subunit 1	ERF1_HUMAN	Sprot_041812.fas	49032.6	0.5	1	1	2	8.21e-05	0.0297
07202012_AS_RSE_samplecomparison	AS	AS	File Name: BH_ASE1_718.raw (F635454)	MAP7 domain-containing protein 1	MA7D1_HUMAN	Sprot_041812.fas	92820.2	0.978	1	1	2	8.21e-05	0.0155
07202012_AS_RSE_samplecomparison	AS	AS	File Name: BH_ASE1_718.raw (F635454)	40S ribosomal protein S18	RS18_HUMAN	Sprot_041812.fas	17719.3	1	13	13	25	0.00103	0.566
07202012_AS_RSE_samplecomparison	AS	AS	File Name: BH_ASE1_718.raw (F635454)	Keratin, type II cytoskeletal 5	K2C5_HUMAN	Sprot_041812.fas	62379.6	0.999	2	2	3	0.000123	0.0559
07202012_AS_RSE_samplecomparison	AS	AS	File Name: BH_ASE1_718.raw (F635454)	Nucleolar RNA helicase 2	DDX21_HUMAN	Sprot_041812.fas	87346	1	40	49	91	0.00374	0.534
07202012_AS_RSE_samplecomparison	AS	AS	File Name: BH_ASE1_718.raw (F635454)	Importin subunit alpha-2	IMA2_HUMAN	Sprot_041812.fas	57862.5	1	4	4	5	0.000205	0.144
07202012_AS_RSE_samplecomparison	AS	AS	File Name: BH_ASE1_718.raw (F635454)	Ras GTPase-activating protein-binding protein 2	G3BP2_HUMAN	Sprot_041812.fas	54120.3	0.99	1	1	1	4.11e-05	0.0581
07202012_AS_RSE_samplecomparison	AS	AS	File Name: BH_ASE1_718.raw (F635454)	60S ribosomal protein L38	RL38_HUMAN	Sprot_041812.fas	8218.5	1	3	5	10	0.000411	0.4
07202012_AS_RSE_samplecomparison	AS	AS	File Name: BH_ASE1_718.raw (F635454)	Histone H3.2	H32_HUMAN	Sprot_041812.fas	15388.7	0.993	1	1	1	4.11e-05	0.235
07202012_AS_RSE_samplecomparison	AS	AS	File Name: BH_ASE1_718.raw (F635454)	60S ribosomal protein L6	RL6_HUMAN	Sprot_041812.fas	32729.3	1	17	23	42	0.00172	0.542
07202012_AS_RSE_samplecomparison	AS	AS	File Name: BH_ASE1_718.raw (F635454)	Interleukin enhancer-binding factor 3	ILF3_HUMAN	Sprot_041812.fas	95338.9	1	24	28	49	0.00201	0.454
07202012_AS_RSE_samplecomparison	AS	AS	File Name: BH_ASE1_718.raw (F635454)	Actin, cytoplasmic 1	ACTB_HUMAN,ACTG_HUMAN	Sprot_041812.fas	41737.8	1	7	9	14	0.000575	0.363
07202012_AS_RSE_samplecomparison	AS	AS	File Name: BH_ASE1_718.raw (F635454)	60S ribosomal protein L19	RL19_HUMAN	Sprot_041812.fas	23467.4	1	9	11	18	0.000739	0.291
07202012_AS_RSE_samplecomparison	AS	AS	File Name: BH_ASE1_718.raw (F635454)	Creatine kinase B-type	KCRB_HUMAN	Sprot_041812.fas	42645.1	1	3	3	4	0.000164	0.147
07202012_AS_RSE_samplecomparison	AS	AS	File Name: BH_ASE1_718.raw (F635454)	40S ribosomal protein S2	RS2_HUMAN	Sprot_041812.fas	31325.2	1	11	14	29	0.00119	0.365
07202012_AS_RSE_samplecomparison	AS	AS	File Name: BH_ASE1_718.raw (F635454)	Double-stranded RNA-specific adenosine deaminase	DSRAD_HUMAN	Sprot_041812.fas	136070	1	3	3	3	0.000123	0.0351
07202012_AS_RSE_samplecomparison	AS	AS	File Name: BH_ASE1_718.raw (F635454)	Ras GTPase-activating protein-binding protein 1	G3BP1_HUMAN	Sprot_041812.fas	52162.8	1	7	7	8	0.000328	0.245
07202012_AS_RSE_samplecomparison	AS	AS	File Name: BH_ASE1_718.raw (F635454)	Complement component 1 Q subcomponent-binding protein, mitochondrial	C1QBP_HUMAN	Sprot_041812.fas	31362.6	1	3	3	9	0.000369	0.255
07202012_AS_RSE_samplecomparison	AS	AS	File Name: BH_ASE1_718.raw (F635454)	Heterogeneous nuclear ribonucleoprotein A3	ROA3_HUMAN	Sprot_041812.fas	39595.1	0.999	2	2	2	8.21e-05	0.106
07202012_AS_RSE_samplecomparison	AS	AS	File Name: BH_ASE1_718.raw (F635454)	Bifunctional glutamate/proline--tRNA ligase	SYEP_HUMAN	Sprot_041812.fas	170593	1	2	3	3	0.000123	0.0337
07202012_AS_RSE_samplecomparison	AS	AS	File Name: BH_ASE1_718.raw (F635454)	40S ribosomal protein S3a	RS3A_HUMAN	Sprot_041812.fas	29945.3	1	18	23	40	0.00164	0.64
07202012_AS_RSE_samplecomparison	AS	AS	File Name: BH_ASE1_718.raw (F635454)	60S ribosomal protein L5	RL5_HUMAN	Sprot_041812.fas	34363.5	1	17	23	39	0.0016	0.64
07202012_AS_RSE_samplecomparison	AS	AS	File Name: BH_ASE1_718.raw (F635454)	60S ribosomal protein L11	RL11_HUMAN	Sprot_041812.fas	20253.2	1	7	10	17	0.000698	0.41
07202012_AS_RSE_samplecomparison	AS	AS	File Name: BH_ASE1_718.raw (F635454)	Glyceraldehyde-3-phosphate dehydrogenase	G3P_HUMAN	Sprot_041812.fas	36053.4	1	7	8	16	0.000657	0.322
07202012_AS_RSE_samplecomparison	AS	AS	File Name: BH_ASE1_718.raw (F635454)	La-related protein 4	LARP4_HUMAN	Sprot_041812.fas	80596.3	1	6	6	8	0.000328	0.163
07202012_AS_RSE_samplecomparison	AS	AS	File Name: BH_ASE1_718.raw (F635454)	60S ribosomal protein L18	RL18_HUMAN	Sprot_041812.fas	21635.2	1	10	12	20	0.000821	0.436
07202012_AS_RSE_samplecomparison	AS	AS	File Name: BH_ASE1_718.raw (F635454)	Pyruvate kinase isozymes M1/M2	KPYM_HUMAN	Sprot_041812.fas	57937.5	0.998	2	2	2	8.21e-05	0.0546
07202012_AS_RSE_samplecomparison	AS	AS	File Name: BH_ASE1_718.raw (F635454)	Enhancer of mRNA-decapping protein 3	EDC3_HUMAN	Sprot_041812.fas	56077.4	1	6	7	7	0.000287	0.211
07202012_AS_RSE_samplecomparison	AS	AS	File Name: BH_ASE1_718.raw (F635454)	40S ribosomal protein S27	RS27_HUMAN	Sprot_041812.fas	9460.9	1	3	3	5	0.000205	0.405
07202012_AS_RSE_samplecomparison	AS	AS	File Name: BH_ASE1_718.raw (F635454)	Nuclear cap-binding protein subunit 1	NCBP1_HUMAN	Sprot_041812.fas	91841.1	1	6	7	14	0.000575	0.144
07202012_AS_RSE_samplecomparison	AS	AS	File Name: BH_ASE1_718.raw (F635454)	Eukaryotic translation initiation factor 3 subunit I	EIF3I_HUMAN	Sprot_041812.fas	36502	0.911	0	0	0	0	0
07202012_AS_RSE_samplecomparison	AS	AS	File Name: BH_ASE1_718.raw (F635454)	Histone H1x	H1X_HUMAN	Sprot_041812.fas	22487.9	1	3	3	4	0.000164	0.127
07202012_AS_RSE_samplecomparison	AS	AS	File Name: BH_ASE1_718.raw (F635454)	Hornerin	HORN_HUMAN	Sprot_041812.fas	282373	1	3	3	5	0.000205	0.0242
07202012_AS_RSE_samplecomparison	AS	AS	File Name: BH_ASE1_718.raw (F635454)	14-3-3 protein gamma	1433G_HUMAN	Sprot_041812.fas	28303.1	1	4	4	9	0.000369	0.409
07202012_AS_RSE_samplecomparison	AS	AS	File Name: BH_ASE1_718.raw (F635454)	Heterogeneous nuclear ribonucleoproteins A2/B1	ROA2_HUMAN	Sprot_041812.fas	37430.3	1	4	4	5	0.000205	0.195
07202012_AS_RSE_samplecomparison	AS	AS	File Name: BH_ASE1_718.raw (F635454)	Matrin-3	MATR3_HUMAN	Sprot_041812.fas	94626.7	1	7	9	15	0.000616	0.139
07202012_AS_RSE_samplecomparison	AS	AS	File Name: BH_ASE1_718.raw (F635454)	La-related protein 4B	LAR4B_HUMAN	Sprot_041812.fas	80553.1	1	5	5	7	0.000287	0.0705
07202012_AS_RSE_samplecomparison	AS	AS	File Name: BH_ASE1_718.raw (F635454)	ATP-dependent RNA helicase A	DHX9_HUMAN	Sprot_041812.fas	140962	1	28	33	53	0.00218	0.331
07202012_AS_RSE_samplecomparison	AS	AS	File Name: BH_ASE1_718.raw (F635454)	Nuclease-sensitive element-binding protein 1	YBOX1_HUMAN	Sprot_041812.fas	35923.8	1	15	24	176	0.00723	0.636
07202012_AS_RSE_samplecomparison	AS	AS	File Name: BH_ASE1_718.raw (F635454)	40S ribosomal protein S17-like	RS17L_HUMAN,RS17_HUMAN	Sprot_041812.fas	15550.5	1	8	10	19	0.00078	0.615
07202012_AS_RSE_samplecomparison	AS	AS	File Name: BH_ASE1_718.raw (F635454)	RuvB-like 2	RUVB2_HUMAN	Sprot_041812.fas	51158.1	0.5	1	1	1	4.11e-05	0.0238
07202012_AS_RSE_samplecomparison	AS	AS	File Name: BH_ASE1_718.raw (F635454)	60S ribosomal protein L37a	RL37A_HUMAN	Sprot_041812.fas	10275.4	1	4	5	11	0.000452	0.5
07202012_AS_RSE_samplecomparison	AS	AS	File Name: BH_ASE1_718.raw (F635454)	40S ribosomal protein S26	RS26_HUMAN	Sprot_041812.fas	13015.5	1	4	5	7	0.000287	0.374
07202012_AS_RSE_samplecomparison	AS	AS	File Name: BH_ASE1_718.raw (F635454)	Protein PRRC2A	PRC2A_HUMAN	Sprot_041812.fas	228866	1	9	9	15	0.000616	0.0955
07202012_AS_RSE_samplecomparison	AS	AS	File Name: BH_ASE1_718.raw (F635454)	Hemoglobin subunit beta	HBB_HUMAN	Sprot_041812.fas	15998	1	3	3	5	0.000205	0.286
07202012_AS_RSE_samplecomparison	AS	AS	File Name: BH_ASE1_718.raw (F635454)	Eukaryotic translation initiation factor 4 gamma 1	IF4G1_HUMAN	Sprot_041812.fas	175494	1	11	11	15	0.000616	0.125
07202012_AS_RSE_samplecomparison	AS	AS	File Name: BH_ASE1_718.raw (F635454)	Interleukin enhancer-binding factor 2	ILF2_HUMAN	Sprot_041812.fas	43062.7	1	13	16	33	0.00135	0.526
07202012_AS_RSE_samplecomparison	AS	AS	File Name: BH_ASE1_718.raw (F635454)	RNA-binding protein 14	RBM14_HUMAN	Sprot_041812.fas	69492.3	1	3	3	4	0.000164	0.0747
07202012_AS_RSE_samplecomparison	AS	AS	File Name: BH_ASE1_718.raw (F635454)	Putative helicase MOV-10	MOV10_HUMAN	Sprot_041812.fas	113676	1	3	3	7	0.000287	0.0419
07202012_AS_RSE_samplecomparison	AS	AS	File Name: BH_ASE1_718.raw (F635454)	Ribosomal L1 domain-containing protein 1	RL1D1_HUMAN	Sprot_041812.fas	54974.7	1	20	24	46	0.00189	0.518
07202012_AS_RSE_samplecomparison	AS	AS	File Name: BH_ASE1_718.raw (F635454)	La-related protein 1	LARP1_HUMAN	Sprot_041812.fas	123513	1	25	27	56	0.0023	0.39
07202012_AS_RSE_samplecomparison	AS	AS	File Name: BH_ASE1_718.raw (F635454)	YTH domain family protein 2	YTHD2_HUMAN	Sprot_041812.fas	62334.4	1	6	6	10	0.000411	0.235
07202012_AS_RSE_samplecomparison	AS	AS	File Name: BH_ASE1_718.raw (F635454)	60S ribosomal protein L36a	RL36A_HUMAN	Sprot_041812.fas	12441.1	1	4	4	5	0.000205	0.311
07202012_AS_RSE_samplecomparison	AS	AS	File Name: BH_ASE1_718.raw (F635454)	Pre-mRNA-processing-splicing factor 8	PRP8_HUMAN	Sprot_041812.fas	273609	0.98	1	1	1	4.11e-05	0.00857
07202012_AS_RSE_samplecomparison	AS	AS	File Name: BH_ASE1_718.raw (F635454)	Histone H2A type 1-B/E	H2A1B_HUMAN,H2A1C_HUMAN,H2A1D_HUMAN,H2A1H_HUMAN,H2A1J_HUMAN,H2A1_HUMAN,H2A2A_HUMAN,H2A2C_HUMAN,H2A3_HUMAN,H2AJ_HUMAN	Sprot_041812.fas	14136.1	0.998	2	3	7	0.000287	0.215
07202012_AS_RSE_samplecomparison	AS	AS	File Name: BH_ASE1_718.raw (F635454)	60S ribosomal protein L27	RL27_HUMAN	Sprot_041812.fas	15798.4	1	5	6	10	0.000411	0.434
07202012_AS_RSE_samplecomparison	AS	AS	File Name: BH_ASE1_718.raw (F635454)	Histone H4	H4_HUMAN	Sprot_041812.fas	11367.7	1	5	5	7	0.000287	0.515
07202012_AS_RSE_samplecomparison	AS	AS	File Name: BH_ASE1_718.raw (F635454)	60S ribosomal protein L36	RL36_HUMAN	Sprot_041812.fas	12254.2	1	6	7	11	0.000452	0.419
07202012_AS_RSE_samplecomparison	AS	AS	File Name: BH_ASE1_718.raw (F635454)	Pre-mRNA-processing factor 19	PRP19_HUMAN	Sprot_041812.fas	55181.3	1	2	2	3	0.000123	0.0575
07202012_AS_RSE_samplecomparison	AS	AS	File Name: BH_ASE1_718.raw (F635454)	Small nuclear ribonucleoprotein Sm D1	SMD1_HUMAN	Sprot_041812.fas	13281.9	0.998	2	3	5	0.000205	0.277
07202012_AS_RSE_samplecomparison	AS	AS	File Name: BH_ASE1_718.raw (F635454)	60S ribosomal protein L4	RL4_HUMAN	Sprot_041812.fas	47699.1	1	22	31	57	0.00234	0.534
07202012_AS_RSE_samplecomparison	AS	AS	File Name: BH_ASE1_718.raw (F635454)	Nucleolin	NUCL_HUMAN	Sprot_041812.fas	76615.9	1	11	12	19	0.00078	0.201
07202012_AS_RSE_samplecomparison	AS	AS	File Name: BH_ASE1_718.raw (F635454)	Coiled-coil domain-containing protein 124	CC124_HUMAN	Sprot_041812.fas	25835.7	0.997	2	2	3	0.000123	0.161
07202012_AS_RSE_samplecomparison	AS	AS	File Name: BH_ASE1_718.raw (F635454)	60S ribosomal protein L35a	RL35A_HUMAN	Sprot_041812.fas	12538.1	1	5	5	7	0.000287	0.409
07202012_AS_RSE_samplecomparison	AS	AS	File Name: BH_ASE1_718.raw (F635454)	60S ribosomal protein L17	RL17_HUMAN	Sprot_041812.fas	21397.4	1	8	11	17	0.000698	0.386
07202012_AS_RSE_samplecomparison	AS	AS	File Name: BH_ASE1_718.raw (F635454)	YTH domain family protein 1	YTHD1_HUMAN	Sprot_041812.fas	60872.9	1	4	4	4	0.000164	0.0859
07202012_AS_RSE_samplecomparison	AS	AS	File Name: BH_ASE1_718.raw (F635454)	mRNA-decapping enzyme 1A	DCP1A_HUMAN	Sprot_041812.fas	63310.1	1	3	3	3	0.000123	0.0911
07202012_AS_RSE_samplecomparison	AS	AS	File Name: BH_ASE1_718.raw (F635454)	H/ACA ribonucleoprotein complex subunit 4	DKC1_HUMAN	Sprot_041812.fas	57675.2	1	3	3	4	0.000164	0.103
07202012_AS_RSE_samplecomparison	AS	AS	File Name: BH_ASE1_718.raw (F635454)	60S ribosomal protein L26	RL26_HUMAN	Sprot_041812.fas	17258.4	1	7	10	17	0.000698	0.455
07202012_AS_RSE_samplecomparison	AS	AS	File Name: BH_ASE1_718.raw (F635454)	Keratin, type I cytoskeletal 9	K1C9_HUMAN	Sprot_041812.fas	62065.9	1	17	19	32	0.00131	0.387
07202012_AS_RSE_samplecomparison	AS	AS	File Name: BH_ASE1_718.raw (F635454)	Eukaryotic translation initiation factor 3 subunit H	EIF3H_HUMAN	Sprot_041812.fas	39930.6	1	3	3	4	0.000164	0.182
07202012_AS_RSE_samplecomparison	AS	AS	File Name: BH_ASE1_718.raw (F635454)	Tubulin beta chain	TBB5_HUMAN	Sprot_041812.fas	49670.6	1	28	37	89	0.00365	0.739
07202012_AS_RSE_samplecomparison	AS	AS	File Name: BH_ASE1_718.raw (F635454)	Proliferation-associated protein 2G4	PA2G4_HUMAN	Sprot_041812.fas	43786.7	1	4	5	9	0.000369	0.188
07202012_AS_RSE_samplecomparison	AS	AS	File Name: BH_ASE1_718.raw (F635454)	Heterogeneous nuclear ribonucleoprotein A1	ROA1_HUMAN	Sprot_041812.fas	38747	1	5	5	6	0.000246	0.18
07202012_AS_RSE_samplecomparison	AS	AS	File Name: BH_ASE1_718.raw (F635454)	14-3-3 protein zeta/delta	1433Z_HUMAN	Sprot_041812.fas	27745.9	1	5	6	8	0.000328	0.355
07202012_AS_RSE_samplecomparison	AS	AS	File Name: BH_ASE1_718.raw (F635454)	Peroxiredoxin-1	PRDX1_HUMAN	Sprot_041812.fas	22110.9	1	3	3	3	0.000123	0.271
07202012_AS_RSE_samplecomparison	AS	AS	File Name: BH_ASE1_718.raw (F635454)	Elongation factor 2	EF2_HUMAN	Sprot_041812.fas	95340.1	1	17	19	36	0.00148	0.314
07202012_AS_RSE_samplecomparison	AS	AS	File Name: BH_ASE1_718.raw (F635454)	DNA-binding protein A	DBPA_HUMAN	Sprot_041812.fas	40089.4	1	21	28	63	0.00259	0.613
07202012_AS_RSE_samplecomparison	AS	AS	File Name: BH_ASE1_718.raw (F635454)	Alpha-enolase	ENOA_HUMAN	Sprot_041812.fas	47170.2	1	4	4	8	0.000328	0.15
07202012_AS_RSE_samplecomparison	AS	AS	File Name: BH_ASE1_718.raw (F635454)	Eukaryotic initiation factor 4A-III	IF4A3_HUMAN	Sprot_041812.fas	46872.4	1	4	4	4	0.000164	0.134
07202012_AS_RSE_samplecomparison	AS	AS	File Name: BH_ASE1_718.raw (F635454)	Heterogeneous nuclear ribonucleoprotein R	HNRPR_HUMAN	Sprot_041812.fas	70943.9	1	20	23	38	0.00156	0.338
07202012_AS_RSE_samplecomparison	AS	AS	File Name: BH_ASE1_718.raw (F635454)	40S ribosomal protein S25	RS25_HUMAN	Sprot_041812.fas	13743	1	5	5	9	0.000369	0.312
07202012_AS_RSE_samplecomparison	AS	AS	File Name: BH_ASE1_718.raw (F635454)	14-3-3 protein epsilon	1433E_HUMAN	Sprot_041812.fas	29175	1	7	8	13	0.000534	0.514
07202012_AS_RSE_samplecomparison	AS	AS	File Name: BH_ASE1_718.raw (F635454)	Heterogeneous nuclear ribonucleoprotein A0	ROA0_HUMAN	Sprot_041812.fas	30840.5	1	3	3	3	0.000123	0.167
07202012_AS_RSE_samplecomparison	AS	AS	File Name: BH_ASE1_718.raw (F635454)	Tubulin alpha-1B chain	TBA1B_HUMAN	Sprot_041812.fas	50151.7	1	19	23	51	0.00209	0.585
07202012_AS_RSE_samplecomparison	AS	AS	File Name: BH_ASE1_718.raw (F635454)	Keratin, type II cytoskeletal 1	K2C1_HUMAN	Sprot_041812.fas	66040.3	1	23	28	50	0.00205	0.388
07202012_AS_RSE_samplecomparison	AS	AS	File Name: BH_ASE1_718.raw (F635454)	Interferon-induced, double-stranded RNA-activated protein kinase	E2AK2_HUMAN	Sprot_041812.fas	62097.1	1	6	6	9	0.000369	0.16
07202012_AS_RSE_samplecomparison	AS	AS	File Name: BH_ASE1_718.raw (F635454)	40S ribosomal protein S15	RS15_HUMAN	Sprot_041812.fas	17040.8	1	7	9	19	0.00078	0.621
07202012_AS_RSE_samplecomparison	AS	AS	File Name: BH_ASE1_718.raw (F635454)	Ubiquitin-40S ribosomal protein S27a	RS27A_HUMAN	Sprot_041812.fas	17965.6	1	3	5	8	0.000328	0.263
07202012_AS_RSE_samplecomparison	AS	AS	File Name: BH_ASE1_718.raw (F635454)	60S ribosomal protein L35	RL35_HUMAN	Sprot_041812.fas	14552.5	1	6	7	14	0.000575	0.39
07202012_AS_RSE_samplecomparison	AS	AS	File Name: BH_ASE1_718.raw (F635454)	40S ribosomal protein S5	RS5_HUMAN	Sprot_041812.fas	22877	1	12	17	28	0.00115	0.559
07202012_AS_RSE_samplecomparison	AS	AS	File Name: BH_ASE1_718.raw (F635454)	Fructose-bisphosphate aldolase A	ALDOA_HUMAN	Sprot_041812.fas	39420.6	1	4	4	4	0.000164	0.206
07202012_AS_RSE_samplecomparison	AS	AS	File Name: BH_ASE1_718.raw (F635454)	Inosine-5'-monophosphate dehydrogenase 2	IMDH2_HUMAN	Sprot_041812.fas	55806.5	0.998	2	2	3	0.000123	0.0856
07202012_AS_RSE_samplecomparison	AS	AS	File Name: BH_ASE1_718.raw (F635454)	40S ribosomal protein S9	RS9_HUMAN	Sprot_041812.fas	22592.5	1	12	13	15	0.000616	0.459
07202012_AS_RSE_samplecomparison	AS	AS	File Name: BH_ASE1_718.raw (F635454)	40S ribosomal protein S16	RS16_HUMAN	Sprot_041812.fas	16445.9	1	12	17	37	0.00152	0.596
07202012_AS_RSE_samplecomparison	AS	AS	File Name: BH_ASE1_718.raw (F635454)	Transcriptional activator protein Pur-alpha	PURA_HUMAN	Sprot_041812.fas	34911.1	0.998	2	2	2	8.21e-05	0.109
07202012_AS_RSE_samplecomparison	AS	AS	File Name: BH_ASE1_718.raw (F635454)	Chromatin target of PRMT1 protein	CHTOP_HUMAN	Sprot_041812.fas	26397.8	1	3	4	5	0.000205	0.169
07202012_AS_RSE_samplecomparison	AS	AS	File Name: BH_ASE1_718.raw (F635454)	60S ribosomal protein L34	RL34_HUMAN	Sprot_041812.fas	13293.1	1	5	5	8	0.000328	0.265
07202012_AS_RSE_samplecomparison	AS	AS	File Name: BH_ASE1_718.raw (F635454)	RNA-binding motif protein, X chromosome	RBMX_HUMAN	Sprot_041812.fas	42333.7	1	12	14	16	0.000657	0.256
07202012_AS_RSE_samplecomparison	AS	AS	File Name: BH_ASE1_718.raw (F635454)	TRMT1-like protein	TRM1L_HUMAN	Sprot_041812.fas	81748.4	0.191	0	0	0	0	0
07202012_AS_RSE_samplecomparison	AS	AS	File Name: BH_ASE1_718.raw (F635454)	DnaJ homolog subfamily A member 2	DNJA2_HUMAN	Sprot_041812.fas	45745.7	1	5	5	8	0.000328	0.289
07202012_AS_RSE_samplecomparison	AS	AS	File Name: BH_ASE1_718.raw (F635454)	ELAV-like protein 1	ELAV1_HUMAN	Sprot_041812.fas	36092.6	0.5	1	1	2	8.21e-05	0.0337
07202012_AS_RSE_samplecomparison	AS	AS	File Name: BH_ASE1_718.raw (F635454)	60S ribosomal protein L15	RL15_HUMAN	Sprot_041812.fas	24146.5	1	11	13	22	0.000903	0.466
07202012_AS_RSE_samplecomparison	AS	AS	File Name: BH_ASE1_718.raw (F635454)	Heterogeneous nuclear ribonucleoprotein Q	HNRPQ_HUMAN	Sprot_041812.fas	69603.5	1	12	12	20	0.000821	0.347
07202012_AS_RSE_samplecomparison	AS	AS	File Name: BH_ASE1_718.raw (F635454)	Stress-induced-phosphoprotein 1	STIP1_HUMAN	Sprot_041812.fas	62642.1	0.5	1	1	2	8.21e-05	0.046
07202012_AS_RSE_samplecomparison	AS	AS	File Name: BH_ASE1_718.raw (F635454)	Keratin, type I cytoskeletal 10	K1C10_HUMAN	Sprot_041812.fas	58828.8	1	12	14	22	0.000903	0.303
07202012_AS_RSE_samplecomparison	AS	AS	File Name: BH_ASE1_718.raw (F635454)	Histone H2B type 1-C/E/F/G/I	H2B1C_HUMAN,H2B1D_HUMAN,H2B1H_HUMAN,H2B1K_HUMAN,H2B1L_HUMAN,H2B1M_HUMAN,H2B1N_HUMAN,H2B2F_HUMAN,H2BFS_HUMAN	Sprot_041812.fas	13906.6	1	4	4	7	0.000287	0.27
07202012_AS_RSE_samplecomparison	AS	AS	File Name: BH_ASE1_718.raw (F635454)	40S ribosomal protein S20	RS20_HUMAN	Sprot_041812.fas	13373	1	5	7	11	0.000452	0.395
07202012_AS_RSE_samplecomparison	AS	AS	File Name: BH_ASE1_718.raw (F635454)	60S ribosomal protein L24	RL24_HUMAN	Sprot_041812.fas	17779.5	1	7	9	17	0.000698	0.395
07202012_AS_RSE_samplecomparison	AS	AS	File Name: BH_ASE1_718.raw (F635454)	Eukaryotic translation initiation factor 3 subunit F	EIF3F_HUMAN	Sprot_041812.fas	37563.5	1	2	3	3	0.000123	0.084
07202012_AS_RSE_samplecomparison	AS	AS	File Name: BH_ASE1_718.raw (F635454)	Insulin-like growth factor 2 mRNA-binding protein 3	IF2B3_HUMAN	Sprot_041812.fas	63706	1	24	28	56	0.0023	0.528
07202012_AS_RSE_samplecomparison	AS	AS	File Name: BH_ASE1_718.raw (F635454)	40S ribosomal protein S8	RS8_HUMAN	Sprot_041812.fas	24206.4	1	15	18	36	0.00148	0.611
07202012_AS_RSE_samplecomparison	AS	AS	File Name: BH_ASE1_718.raw (F635454)	Zinc finger protein 346	ZN346_HUMAN	Sprot_041812.fas	32932.4	0.996	2	2	2	8.21e-05	0.122
07202012_AS_RSE_samplecomparison	AS	AS	File Name: BH_ASE1_718.raw (F635454)	40S ribosomal protein SA	RSSA_HUMAN	Sprot_041812.fas	32854.1	1	15	17	38	0.00156	0.607
07202012_AS_RSE_samplecomparison	AS	AS	File Name: BH_ASE1_718.raw (F635454)	D-3-phosphoglycerate dehydrogenase	SERA_HUMAN	Sprot_041812.fas	56650.6	1	2	2	2	8.21e-05	0.105
07202012_AS_RSE_samplecomparison	AS	AS	File Name: BH_ASE1_718.raw (F635454)	ATP-dependent RNA helicase DDX18	DDX18_HUMAN	Sprot_041812.fas	75409.7	1	3	3	4	0.000164	0.0507
07202012_AS_RSE_samplecomparison	AS	AS	File Name: BH_ASE1_718.raw (F635454)	Protein TFG	TFG_HUMAN	Sprot_041812.fas	43448.3	0.993	1	1	3	0.000123	0.0725
07202012_AS_RSE_samplecomparison	AS	AS	File Name: BH_ASE1_718.raw (F635454)	40S ribosomal protein S14	RS14_HUMAN	Sprot_041812.fas	16272.9	1	10	17	35	0.00144	0.735
07202012_AS_RSE_samplecomparison	AS	AS	File Name: BH_ASE1_718.raw (F635454)	Heterogeneous nuclear ribonucleoprotein F	HNRPF_HUMAN	Sprot_041812.fas	45671.9	0.5	1	1	1	4.11e-05	0.0819
07202012_AS_RSE_samplecomparison	AS	AS	File Name: BH_ASE1_718.raw (F635454)	40S ribosomal protein S23	RS23_HUMAN	Sprot_041812.fas	15807.7	1	4	5	8	0.000328	0.385
07202012_AS_RSE_samplecomparison	AS	AS	File Name: BH_ASE1_718.raw (F635454)	Superkiller viralicidic activity 2-like 2	SK2L2_HUMAN	Sprot_041812.fas	117808	0.5	1	1	2	8.21e-05	0.0211
07202012_AS_RSE_samplecomparison	AS	AS	File Name: BH_ASE1_718.raw (F635454)	Transitional endoplasmic reticulum ATPase	TERA_HUMAN	Sprot_041812.fas	89324.8	1	4	4	4	0.000164	0.0732
07202012_AS_RSE_samplecomparison	AS	AS	File Name: BH_ASE1_718.raw (F635454)	Eukaryotic translation initiation factor 3 subunit E	EIF3E_HUMAN	Sprot_041812.fas	52222.6	0.998	2	2	2	8.21e-05	0.0472
07202012_AS_RSE_samplecomparison	AS	AS	File Name: BH_ASE1_718.raw (F635454)	Insulin-like growth factor 2 mRNA-binding protein 2	IF2B2_HUMAN	Sprot_041812.fas	66122.4	1	10	10	15	0.000616	0.295
07202012_AS_RSE_samplecomparison	AS	AS	File Name: BH_ASE1_718.raw (F635454)	60S ribosomal protein L13a	RL13A_HUMAN	Sprot_041812.fas	23577.9	1	9	11	19	0.00078	0.355
07202012_AS_RSE_samplecomparison	AS	AS	File Name: BH_ASE1_718.raw (F635454)	Macrophage migration inhibitory factor	MIF_HUMAN	Sprot_041812.fas	12476.5	1	3	3	6	0.000246	0.652
07202012_AS_RSE_samplecomparison	AS	AS	File Name: BH_ASE1_718.raw (F635454)	Enhancer of rudimentary homolog	ERH_HUMAN	Sprot_041812.fas	12259.3	0.998	2	2	4	0.000164	0.327
07202012_AS_RSE_samplecomparison	AS	AS	File Name: BH_ASE1_718.raw (F635454)	Heterogeneous nuclear ribonucleoprotein D-like	HNRDL_HUMAN	Sprot_041812.fas	46438.6	0.999	2	3	3	0.000123	0.0786
07202012_AS_RSE_samplecomparison	AS	AS	File Name: BH_ASE1_718.raw (F635454)	Constitutive coactivator of PPAR-gamma-like protein 1	F120A_HUMAN	Sprot_041812.fas	121889	1	21	24	36	0.00148	0.248
07202012_AS_RSE_samplecomparison	AS	AS	File Name: BH_ASE1_718.raw (F635454)	Probable ATP-dependent RNA helicase DDX17	DDX17_HUMAN	Sprot_041812.fas	80274	1	10	12	17	0.000698	0.159
07202012_AS_RSE_samplecomparison	AS	AS	File Name: BH_ASE1_718.raw (F635454)	Histone H1.3	H13_HUMAN	Sprot_041812.fas	22351.3	1	6	9	12	0.000493	0.172
07202012_AS_RSE_samplecomparison	AS	AS	File Name: BH_ASE1_718.raw (F635454)	40S ribosomal protein S13	RS13_HUMAN	Sprot_041812.fas	17223.3	1	8	11	17	0.000698	0.397
07202012_AS_RSE_samplecomparison	AS	AS	File Name: BH_ASE1_718.raw (F635454)	Zinc finger protein 326	ZN326_HUMAN	Sprot_041812.fas	65653.5	1	5	5	6	0.000246	0.127
07202012_AS_RSE_samplecomparison	AS	AS	File Name: BH_ASE1_718.raw (F635454)	Tubulin beta-4B chain	TBB4B_HUMAN	Sprot_041812.fas	49830.7	1	3	3	5	0.000205	0.634
07202012_AS_RSE_samplecomparison	AS	AS	File Name: BH_ASE1_718.raw (F635454)	Probable ATP-dependent RNA helicase DDX5	DDX5_HUMAN	Sprot_041812.fas	69149.7	1	3	3	3	0.000123	0.137
07202012_AS_RSE_samplecomparison	AS	AS	File Name: BH_ASE1_718.raw (F635454)	60S ribosomal protein L28	RL28_HUMAN	Sprot_041812.fas	15747.9	1	10	12	15	0.000616	0.518
07202012_AS_RSE_samplecomparison	AS	AS	File Name: BH_ASE1_718.raw (F635454)	Eukaryotic initiation factor 4A-I	IF4A1_HUMAN	Sprot_041812.fas	46155.3	1	5	5	5	0.000205	0.204
07202012_AS_RSE_samplecomparison	AS	AS	File Name: BH_ASE1_718.raw (F635454)	60S ribosomal protein L23	RL23_HUMAN	Sprot_041812.fas	14865.9	1	11	13	24	0.000985	0.55
07202012_AS_RSE_samplecomparison	AS	AS	File Name: BH_ASE1_718.raw (F635454)	40S ribosomal protein S7	RS7_HUMAN	Sprot_041812.fas	22127.5	1	15	16	37	0.00152	0.696
07202012_AS_RSE_samplecomparison	AS	AS	File Name: BH_ASE1_718.raw (F635454)	Zinc finger CCCH-type antiviral protein 1	ZCCHV_HUMAN	Sprot_041812.fas	101433	1	7	7	12	0.000493	0.129
07202012_AS_RSE_samplecomparison	AS	AS	File Name: BH_ASE1_718.raw (F635454)	60S ribosomal protein L32	RL32_HUMAN	Sprot_041812.fas	15860.4	1	8	11	16	0.000657	0.489
07202012_AS_RSE_samplecomparison	AS	AS	File Name: BH_ASE1_718.raw (F635454)	Ribonucleases P/MRP protein subunit POP1	POP1_HUMAN	Sprot_041812.fas	114710	0.5	1	1	1	4.11e-05	0.0117
07202012_AS_RSE_samplecomparison	AS	AS	File Name: BH_ASE1_718.raw (F635454)	Poly(rC)-binding protein 2	PCBP2_HUMAN	Sprot_041812.fas	38580.9	1	8	8	17	0.000698	0.405
07202012_AS_RSE_samplecomparison	AS	AS	File Name: BH_ASE1_718.raw (F635454)	60S ribosomal protein L13	RL13_HUMAN	Sprot_041812.fas	24262.2	1	11	13	20	0.000821	0.398
07202012_AS_RSE_samplecomparison	AS	AS	File Name: BH_ASE1_718.raw (F635454)	Eukaryotic translation initiation factor 3 subunit D	EIF3D_HUMAN	Sprot_041812.fas	63973.8	0.988	1	1	1	4.11e-05	0.0347
07202012_AS_RSE_samplecomparison	AS	AS	File Name: BH_ASE1_718.raw (F635454)	Guanine nucleotide-binding protein subunit beta-2-like 1	GBLP_HUMAN	Sprot_041812.fas	35077	1	14	17	30	0.00123	0.647
07202012_AS_RSE_samplecomparison	AS	AS	File Name: BH_ASE1_718.raw (F635454)	Insulin-like growth factor 2 mRNA-binding protein 1	IF2B1_HUMAN	Sprot_041812.fas	63480.5	1	48	76	205	0.00842	0.627
07202012_AS_RSE_samplecomparison	AS	AS	File Name: BH_ASE1_718.raw (F635454)	40S ribosomal protein S6	RS6_HUMAN	Sprot_041812.fas	28681.7	1	15	19	27	0.00111	0.498
07202012_AS_RSE_samplecomparison	AS	AS	File Name: BH_ASE1_718.raw (F635454)	14-3-3 protein beta/alpha	1433B_HUMAN	Sprot_041812.fas	28083.1	0.821	0	0	0	0	0.13
07202012_AS_RSE_samplecomparison	AS	AS	File Name: BH_ASE1_718.raw (F635454)	ATPase WRNIP1	WRIP1_HUMAN	Sprot_041812.fas	72134.2	0.996	2	2	2	8.21e-05	0.0481
07202012_AS_RSE_samplecomparison	AS	AS	File Name: BH_ASE1_718.raw (F635454)	Small nuclear ribonucleoprotein E	RUXE_HUMAN	Sprot_041812.fas	10803.9	1	3	3	4	0.000164	0.565
07202012_AS_RSE_samplecomparison	AS	AS	File Name: BH_ASE1_718.raw (F635454)	Heterogeneous nuclear ribonucleoprotein A/B	ROAA_HUMAN	Sprot_041812.fas	36225.2	1	4	4	6	0.000246	0.102
07202012_AS_RSE_samplecomparison	AS	AS	File Name: BH_ASE1_718.raw (F635454)	40S ribosomal protein S12	RS12_HUMAN	Sprot_041812.fas	14514.8	1	11	14	26	0.00107	0.674
07202012_AS_RSE_samplecomparison	AS	AS	File Name: BH_ASE1_718.raw (F635454)	Heterogeneous nuclear ribonucleoprotein D0	HNRPD_HUMAN	Sprot_041812.fas	38434.5	0.998	2	2	3	0.000123	0.0873
07202012_AS_RSE_samplecomparison	AS	AS	File Name: BH_ASE1_718.raw (F635454)	Melanoma-associated antigen D1	MAGD1_HUMAN	Sprot_041812.fas	86162.5	0.998	2	2	3	0.000123	0.0591
07202012_AS_RSE_samplecomparison	AS	AS	File Name: BH_ASE1_718.raw (F635454)	60S ribosomal protein L14	RL14_HUMAN	Sprot_041812.fas	23432.3	1	8	10	19	0.00078	0.358
07202012_AS_RSE_samplecomparison	AS	AS	File Name: BH_ASE1_718.raw (F635454)	40S ribosomal protein S21	RS21_HUMAN	Sprot_041812.fas	9111.6	1	5	6	9	0.000369	0.639
07202012_AS_RSE_samplecomparison	AS	AS	File Name: BH_ASE1_718.raw (F635454)	Protein-L-isoaspartate(D-aspartate) O-methyltransferase	PIMT_HUMAN	Sprot_041812.fas	24636.8	1	9	12	18	0.000739	0.731
07202012_AS_RSE_samplecomparison	AS	AS	File Name: BH_ASE1_718.raw (F635454)	60S acidic ribosomal protein P0	RLA0_HUMAN	Sprot_041812.fas	34274.3	1	14	16	29	0.00119	0.574
07202012_AS_RSE_samplecomparison	AS	AS	File Name: BH_ASE1_718.raw (F635454)	Lupus La protein	LA_HUMAN	Sprot_041812.fas	46839	1	5	5	6	0.000246	0.147
07202012_AS_RSE_samplecomparison	AS	AS	File Name: BH_ASE1_718.raw (F635454)	RNA-binding protein FUS	FUS_HUMAN	Sprot_041812.fas	53426	1	3	3	4	0.000164	0.0894
07202012_AS_RSE_samplecomparison	AS	AS	File Name: BH_ASE1_718.raw (F635454)	Polyadenylate-binding protein 2	PABP2_HUMAN	Sprot_041812.fas	32749.5	1	3	3	6	0.000246	0.17
07202012_AS_RSE_samplecomparison	AS	AS	File Name: BH_ASE1_718.raw (F635454)	Heterogeneous nuclear ribonucleoprotein U-like protein 2	HNRL2_HUMAN	Sprot_041812.fas	85105.2	0.997	2	2	2	8.21e-05	0.0589
07202012_AS_RSE_samplecomparison	AS	AS	File Name: BH_ASE1_718.raw (F635454)	60S ribosomal protein L10a	RL10A_HUMAN	Sprot_041812.fas	24832	1	5	7	10	0.000411	0.267
07202012_AS_RSE_samplecomparison	AS	AS	File Name: BH_ASE1_718.raw (F635454)	40S ribosomal protein S11	RS11_HUMAN	Sprot_041812.fas	18431.3	1	11	14	20	0.000821	0.62
07202012_AS_RSE_samplecomparison	AS	AS	File Name: BH_ASE1_718.raw (F635454)	Tumor protein D54	TPD54_HUMAN	Sprot_041812.fas	22237.9	1	3	3	4	0.000164	0.267
07202012_AS_RSE_samplecomparison	AS	AS	File Name: BH_ASE1_718.raw (F635454)	60S ribosomal protein L22	RL22_HUMAN	Sprot_041812.fas	14787.3	1	6	7	17	0.000698	0.609
07202012_AS_RSE_samplecomparison	AS	AS	File Name: BH_ASE1_718.raw (F635454)	60S ribosomal protein L31	RL31_HUMAN	Sprot_041812.fas	14463.2	0.999	1	1	1	4.11e-05	0.072
07202012_AS_RSE_samplecomparison	AS	AS	File Name: BH_ASE1_718.raw (F635454)	60S ribosomal protein L9	RL9_HUMAN	Sprot_041812.fas	21863.7	1	11	12	15	0.000616	0.573
07202012_AS_RSE_samplecomparison	AS	AS	File Name: BH_ASE1_718.raw (F635454)	E3 ubiquitin-protein ligase TRIM21	RO52_HUMAN	Sprot_041812.fas	54169.5	1	5	5	9	0.000369	0.143
07202012_AS_RSE_samplecomparison	AS	AS	File Name: BH_ASE1_718.raw (F635454)	X-ray repair cross-complementing protein 5	XRCC5_HUMAN	Sprot_041812.fas	82707.1	1	3	3	3	0.000123	0.0806
07202012_AS_RSE_samplecomparison	AS	AS	File Name: BH_ASE1_718.raw (F635454)	Heterogeneous nuclear ribonucleoprotein U-like protein 1	HNRL1_HUMAN	Sprot_041812.fas	95739.7	1	10	11	19	0.00078	0.174
07202012_AS_RSE_samplecomparison	AS	AS	File Name: BH_ASE1_718.raw (F635454)	Polypyrimidine tract-binding protein 1	PTBP1_HUMAN	Sprot_041812.fas	57222.5	0.999	2	2	3	0.000123	0.0584
07202012_AS_RSE_samplecomparison	AS	AS	File Name: BH_ASE1_718.raw (F635454)	60S ribosomal protein L12	RL12_HUMAN	Sprot_041812.fas	17819.1	1	7	7	16	0.000657	0.527
07202012_AS_RSE_samplecomparison	AS	AS	File Name: BH_ASE1_718.raw (F635454)	Protein LSM12 homolog	LSM12_HUMAN	Sprot_041812.fas	21700.4	0.998	2	2	2	8.21e-05	0.138
07202012_AS_RSE_samplecomparison	AS	AS	File Name: BH_ASE1_718.raw (F635454)	40S ribosomal protein S4, X isoform	RS4X_HUMAN	Sprot_041812.fas	29599.3	1	19	26	43	0.00177	0.669
07202012_AS_RSE_samplecomparison	AS	AS	File Name: BH_ASE1_718.raw (F635454)	60S ribosomal protein L21	RL21_HUMAN	Sprot_041812.fas	18565	1	8	9	16	0.000657	0.45
07202012_AS_RSE_samplecomparison	AS	AS	File Name: BH_ASE1_718.raw (F635454)	Glutamate-rich WD repeat-containing protein 1	GRWD1_HUMAN	Sprot_041812.fas	49418.4	0.998	2	2	3	0.000123	0.0785
07202012_AS_RSE_samplecomparison	AS	AS	File Name: BH_ASE1_718.raw (F635454)	60S ribosomal protein L27a	RL27A_HUMAN	Sprot_041812.fas	16561.4	1	4	6	14	0.000575	0.324
07202012_AS_RSE_samplecomparison	AS	AS	File Name: BH_ASE1_718.raw (F635454)	Heat shock 70 kDa protein 1A/1B	HSP71_HUMAN	Sprot_041812.fas	70054	1	37	45	85	0.00349	0.591
07202012_AS_RSE_samplecomparison	AS	AS	File Name: BH_ASE1_718.raw (F635454)	40S ribosomal protein S30	RS30_HUMAN	Sprot_041812.fas	6647.9	0.998	2	2	5	0.000205	0.186
07202012_AS_RSE_samplecomparison	AS	AS	File Name: BH_ASE1_718.raw (F635454)	Probable ATP-dependent RNA helicase DDX6	DDX6_HUMAN	Sprot_041812.fas	54418.6	1	5	5	7	0.000287	0.232
07202012_AS_RSE_samplecomparison	AS	AS	File Name: BH_ASE1_718.raw (F635454)	Arginine--tRNA ligase, cytoplasmic	SYRC_HUMAN	Sprot_041812.fas	75382	0.978	1	1	1	4.11e-05	0.0197
07202012_AS_RSE_samplecomparison	AS	AS	File Name: BH_ASE1_718.raw (F635454)	Protein CASC3	CASC3_HUMAN	Sprot_041812.fas	76277.9	0.994	1	1	1	4.11e-05	0.0171
07202012_AS_RSE_samplecomparison	AS	AS	File Name: BH_ASE1_718.raw (F635454)	Triosephosphate isomerase	TPIS_HUMAN	Sprot_041812.fas	30790.8	1	3	3	3	0.000123	0.185
07202012_AS_RSE_samplecomparison	AS	AS	File Name: BH_ASE1_718.raw (F635454)	Peptidyl-prolyl cis-trans isomerase A	PPIA_HUMAN	Sprot_041812.fas	18012.9	0.5	1	1	1	4.11e-05	0.0848
07202012_AS_RSE_samplecomparison	AS	AS	File Name: BH_ASE1_718.raw (F635454)	Splicing factor 3B subunit 1	SF3B1_HUMAN	Sprot_041812.fas	145835	0.978	1	1	1	4.11e-05	0.0138
07202012_AS_RSE_samplecomparison	AS	AS	File Name: BH_ASE1_718.raw (F635454)	Heat shock protein HSP 90-beta	HS90B_HUMAN	Sprot_041812.fas	83267.3	1	17	17	26	0.00107	0.319
07202012_AS_RSE_samplecomparison	AS	AS	File Name: BH_ASE1_718.raw (F635454)	Nucleoside diphosphate kinase A	NDKA_HUMAN	Sprot_041812.fas	17148.8	0.5	1	1	1	4.11e-05	0.112
07202012_AS_RSE_samplecomparison	AS	AS	File Name: BH_ASE1_718.raw (F635454)	Heterogeneous nuclear ribonucleoproteins C1/C2	HNRPC_HUMAN	Sprot_041812.fas	33670.5	1	12	16	31	0.00127	0.324
07202012_AS_RSE_samplecomparison	AS	AS	File Name: BH_ASE1_718.raw (F635454)	60S ribosomal protein L3	RL3_HUMAN	Sprot_041812.fas	46109.5	1	17	20	39	0.0016	0.459
07202012_AS_RSE_samplecomparison	AS	AS	File Name: BH_ASE1_718.raw (F635454)	Heterogeneous nuclear ribonucleoprotein M	HNRPM_HUMAN	Sprot_041812.fas	77517.3	1	41	49	106	0.00435	0.673
07202012_AS_RSE_samplecomparison	AS	AS	File Name: BH_ASE1_718.raw (F635454)	60S acidic ribosomal protein P1	RLA1_HUMAN	Sprot_041812.fas	11514.1	1	3	3	16	0.000657	0.561
07202012_AS_RSE_samplecomparison	AS	AS	File Name: BH_ASE1_718.raw (F635454)	40S ribosomal protein S24	RS24_HUMAN	Sprot_041812.fas	15423.8	1	6	8	16	0.000657	0.368
07202012_AS_RSE_samplecomparison	AS	AS	File Name: BH_ASE1_718.raw (F635454)	Double-stranded RNA-binding protein Staufen homolog 2	STAU2_HUMAN	Sprot_041812.fas	62641.9	1	3	3	3	0.000123	0.0895
07202012_AS_RSE_samplecomparison	AS	AS	File Name: BH_ASE1_718.raw (F635454)	Eukaryotic translation initiation factor 3 subunit B	EIF3B_HUMAN	Sprot_041812.fas	92482.8	0.5	1	1	1	4.11e-05	0.016
07202012_AS_RSE_samplecomparison	AS	AS	File Name: BH_ASE1_718.raw (F635454)	Polyadenylate-binding protein 4	PABP4_HUMAN	Sprot_041812.fas	70783.8	1	20	29	50	0.00205	0.474
07202012_AS_RSE_samplecomparison	AS	AS	File Name: BH_ASE1_718.raw (F635454)	Eukaryotic translation initiation factor 3 subunit L	EIF3L_HUMAN	Sprot_041812.fas	66729.3	1	5	5	7	0.000287	0.151
07202012_AS_RSE_samplecomparison	AS	AS	File Name: BH_ASE1_718.raw (F635454)	Cofilin-1	COF1_HUMAN	Sprot_041812.fas	18503.2	0.5	1	1	1	4.11e-05	0.0663
07202012_AS_RSE_samplecomparison	AS	AS	File Name: BH_ASE1_718.raw (F635454)	Polyadenylate-binding protein 1	PABP1_HUMAN	Sprot_041812.fas	70671.3	1	46	69	192	0.00788	0.642
07202012_AS_RSE_samplecomparison	AS	AS	File Name: BH_ASE1_718.raw (F635454)	Glutathione S-transferase P	GSTP1_HUMAN	Sprot_041812.fas	23356.7	0.5	1	1	1	4.11e-05	0.0524
07202012_AS_RSE_samplecomparison	AS	AS	File Name: BH_ASE1_718.raw (F635454)	14-3-3 protein theta	1433T_HUMAN	Sprot_041812.fas	27765.4	1	4	4	5	0.000205	0.347
07202012_AS_RSE_samplecomparison	AS	AS	File Name: BH_ASE1_718.raw (F635454)	Sequestosome-1	SQSTM_HUMAN	Sprot_041812.fas	47687.4	1	3	3	4	0.000164	0.132
07202012_AS_RSE_samplecomparison	AS	AS	File Name: BH_ASE1_718.raw (F635454)	THO complex subunit 4	THOC4_HUMAN	Sprot_041812.fas	26888.7	1	3	3	7	0.000287	0.272
07202012_AS_RSE_samplecomparison	AS	AS	File Name: BH_ASE1_718.raw (F635454)	60 kDa heat shock protein, mitochondrial	CH60_HUMAN	Sprot_041812.fas	61055.7	1	3	3	4	0.000164	0.162
07202012_AS_RSE_samplecomparison	AS	AS	File Name: BH_ASE1_718.raw (F635454)	Double-stranded RNA-binding protein Staufen homolog 1	STAU1_HUMAN	Sprot_041812.fas	63183.1	1	7	8	9	0.000369	0.156
07202012_AS_RSE_samplecomparison	AS	AS	File Name: BH_ASE1_718.raw (F635454)	Putative ATP-dependent RNA helicase DHX30	DHX30_HUMAN	Sprot_041812.fas	133942	1	4	4	4	0.000164	0.0377
07202012_AS_RSE_samplecomparison	AS	AS	File Name: BH_ASE1_718.raw (F635454)	60S ribosomal protein L30	RL30_HUMAN	Sprot_041812.fas	12784.7	1	9	12	21	0.000862	0.739
07202012_AS_RSE_samplecomparison	AS	AS	File Name: BH_ASE1_718.raw (F635454)	DnaJ homolog subfamily A member 1	DNJA1_HUMAN	Sprot_041812.fas	44868.6	1	4	4	5	0.000205	0.204
07202012_AS_RSE_samplecomparison	AS	AS	File Name: BH_ASE1_718.raw (F635454)	60S ribosomal protein L8	RL8_HUMAN	Sprot_041812.fas	28024.8	1	17	20	32	0.00131	0.658
07202012_AS_RSE_samplecomparison	RSE	RSE	File Name: BH_RSEE1_718.raw (F635456)	Nucleophosmin	NPM_HUMAN	Sprot_041812.fas	32575.5	1	9	13	20	0.000812	0.381
07202012_AS_RSE_samplecomparison	RSE	RSE	File Name: BH_RSEE1_718.raw (F635456)	60S ribosomal protein L23a	RL23A_HUMAN	Sprot_041812.fas	17696.2	1	10	14	25	0.00102	0.545
07202012_AS_RSE_samplecomparison	RSE	RSE	File Name: BH_RSEE1_718.raw (F635456)	Plasminogen activator inhibitor 1 RNA-binding protein	PAIRB_HUMAN	Sprot_041812.fas	44965.8	1	14	17	22	0.000894	0.395
07202012_AS_RSE_samplecomparison	RSE	RSE	File Name: BH_RSEE1_718.raw (F635456)	Squamous cell carcinoma antigen recognized by T-cells 3	SART3_HUMAN	Sprot_041812.fas	109936	1	2	2	3	0.000122	0.054
07202012_AS_RSE_samplecomparison	RSE	RSE	File Name: BH_RSEE1_718.raw (F635456)	40S ribosomal protein S10	RS10_HUMAN	Sprot_041812.fas	18898.3	1	7	10	27	0.0011	0.588
07202012_AS_RSE_samplecomparison	RSE	RSE	File Name: BH_RSEE1_718.raw (F635456)	60S ribosomal protein L7	RL7_HUMAN	Sprot_041812.fas	29227.7	1	15	17	40	0.00162	0.565
07202012_AS_RSE_samplecomparison	RSE	RSE	File Name: BH_RSEE1_718.raw (F635456)	Transcriptional activator protein Pur-alpha	PURA_HUMAN	Sprot_041812.fas	34911.1	0.977	1	1	2	8.12e-05	0.0807
07202012_AS_RSE_samplecomparison	RSE	RSE	File Name: BH_RSEE1_718.raw (F635456)	Tumor protein D54	TPD54_HUMAN	Sprot_041812.fas	22237.9	0.5	1	2	4	0.000162	0.146
07202012_AS_RSE_samplecomparison	RSE	RSE	File Name: BH_RSEE1_718.raw (F635456)	Heat shock protein HSP 90-alpha	HS90A_HUMAN	Sprot_041812.fas	84663.2	1	4	4	5	0.000203	0.209
07202012_AS_RSE_samplecomparison	RSE	RSE	File Name: BH_RSEE1_718.raw (F635456)	60S ribosomal protein L10	RL10_HUMAN	Sprot_041812.fas	24604.6	1	15	19	33	0.00134	0.612
07202012_AS_RSE_samplecomparison	RSE	RSE	File Name: BH_RSEE1_718.raw (F635456)	60S acidic ribosomal protein P2	RLA2_HUMAN	Sprot_041812.fas	11665.5	1	11	14	27	0.0011	0.852
07202012_AS_RSE_samplecomparison	RSE	RSE	File Name: BH_RSEE1_718.raw (F635456)	Zinc finger RNA-binding protein	ZFR_HUMAN	Sprot_041812.fas	117012	1	3	3	3	0.000122	0.0484
07202012_AS_RSE_samplecomparison	RSE	RSE	File Name: BH_RSEE1_718.raw (F635456)	L-lactate dehydrogenase B chain	LDHB_HUMAN	Sprot_041812.fas	36638.6	1	6	7	10	0.000406	0.32
07202012_AS_RSE_samplecomparison	RSE	RSE	File Name: BH_RSEE1_718.raw (F635456)	40S ribosomal protein S29	RS29_HUMAN	Sprot_041812.fas	6676.9	1	3	3	5	0.000203	0.464
07202012_AS_RSE_samplecomparison	RSE	RSE	File Name: BH_RSEE1_718.raw (F635456)	Regulator of nonsense transcripts 1	RENT1_HUMAN	Sprot_041812.fas	124347	1	19	22	27	0.0011	0.256
07202012_AS_RSE_samplecomparison	RSE	RSE	File Name: BH_RSEE1_718.raw (F635456)	Eukaryotic translation initiation factor 3 subunit A	EIF3A_HUMAN	Sprot_041812.fas	166575	1	6	6	7	0.000284	0.0709
07202012_AS_RSE_samplecomparison	RSE	RSE	File Name: BH_RSEE1_718.raw (F635456)	60S ribosomal protein L29	RL29_HUMAN	Sprot_041812.fas	17753	1	3	4	7	0.000284	0.182
07202012_AS_RSE_samplecomparison	RSE	RSE	File Name: BH_RSEE1_718.raw (F635456)	40S ribosomal protein S3	RS3_HUMAN	Sprot_041812.fas	26688.6	1	24	28	50	0.00203	0.782
07202012_AS_RSE_samplecomparison	RSE	RSE	File Name: BH_RSEE1_718.raw (F635456)	Interferon-inducible double stranded RNA-dependent protein kinase activator A	PRKRA_HUMAN	Sprot_041812.fas	34405.2	1	5	5	5	0.000203	0.332
07202012_AS_RSE_samplecomparison	RSE	RSE	File Name: BH_RSEE1_718.raw (F635456)	Methionine--tRNA ligase, cytoplasmic	SYMC_HUMAN	Sprot_041812.fas	101118	1	4	5	8	0.000325	0.1
07202012_AS_RSE_samplecomparison	RSE	RSE	File Name: BH_RSEE1_718.raw (F635456)	60S ribosomal protein L7a	RL7A_HUMAN	Sprot_041812.fas	29996.3	1	19	25	43	0.00175	0.62
07202012_AS_RSE_samplecomparison	RSE	RSE	File Name: BH_RSEE1_718.raw (F635456)	Heat shock cognate 71 kDa protein	HSP7C_HUMAN	Sprot_041812.fas	70899.8	1	21	24	39	0.00158	0.449
07202012_AS_RSE_samplecomparison	RSE	RSE	File Name: BH_RSEE1_718.raw (F635456)	Elongation factor 1-alpha 1	EF1A1_HUMAN,EF1A3_HUMAN	Sprot_041812.fas	50141.2	1	7	8	11	0.000447	0.331
07202012_AS_RSE_samplecomparison	RSE	RSE	File Name: BH_RSEE1_718.raw (F635456)	Heterogeneous nuclear ribonucleoprotein H	HNRH1_HUMAN	Sprot_041812.fas	49229.8	1	7	8	16	0.00065	0.283
07202012_AS_RSE_samplecomparison	RSE	RSE	File Name: BH_RSEE1_718.raw (F635456)	Enhancer of mRNA-decapping protein 3	EDC3_HUMAN	Sprot_041812.fas	56077.4	1	3	4	4	0.000162	0.0906
07202012_AS_RSE_samplecomparison	RSE	RSE	File Name: BH_RSEE1_718.raw (F635456)	Caprin-1	CAPR1_HUMAN	Sprot_041812.fas	78364.4	1	7	8	14	0.000569	0.165
07202012_AS_RSE_samplecomparison	RSE	RSE	File Name: BH_RSEE1_718.raw (F635456)	60S acidic ribosomal protein P1	RLA1_HUMAN	Sprot_041812.fas	11514.1	1	3	3	15	0.000609	0.561
07202012_AS_RSE_samplecomparison	RSE	RSE	File Name: BH_RSEE1_718.raw (F635456)	Heterogeneous nuclear ribonucleoprotein K	HNRPK_HUMAN	Sprot_041812.fas	50978.5	1	11	15	25	0.00102	0.365
07202012_AS_RSE_samplecomparison	RSE	RSE	File Name: BH_RSEE1_718.raw (F635456)	Macrophage migration inhibitory factor	MIF_HUMAN	Sprot_041812.fas	12476.5	1	3	3	7	0.000284	0.652
07202012_AS_RSE_samplecomparison	RSE	RSE	File Name: BH_RSEE1_718.raw (F635456)	Heterogeneous nuclear ribonucleoprotein U	HNRPU_HUMAN	Sprot_041812.fas	90585.2	1	28	33	63	0.00256	0.481
07202012_AS_RSE_samplecomparison	RSE	RSE	File Name: BH_RSEE1_718.raw (F635456)	40S ribosomal protein S28	RS28_HUMAN	Sprot_041812.fas	7840.9	1	8	8	13	0.000528	0.725
07202012_AS_RSE_samplecomparison	RSE	RSE	File Name: BH_RSEE1_718.raw (F635456)	Protein PRRC2C	PRC2C_HUMAN	Sprot_041812.fas	316908	1	20	21	32	0.0013	0.128
07202012_AS_RSE_samplecomparison	RSE	RSE	File Name: BH_RSEE1_718.raw (F635456)	Myb-binding protein 1A	MBB1A_HUMAN	Sprot_041812.fas	148858	0.998	2	2	4	0.000162	0.0271
07202012_AS_RSE_samplecomparison	RSE	RSE	File Name: BH_RSEE1_718.raw (F635456)	Transcription intermediary factor 1-beta	TIF1B_HUMAN	Sprot_041812.fas	88549	0.999	2	2	4	0.000162	0.0647
07202012_AS_RSE_samplecomparison	RSE	RSE	File Name: BH_RSEE1_718.raw (F635456)	40S ribosomal protein S15a	RS15A_HUMAN	Sprot_041812.fas	14840	1	12	15	29	0.00118	0.731
07202012_AS_RSE_samplecomparison	RSE	RSE	File Name: BH_RSEE1_718.raw (F635456)	Eukaryotic peptide chain release factor subunit 1	ERF1_HUMAN	Sprot_041812.fas	49032.6	0.998	2	2	2	8.12e-05	0.0915
07202012_AS_RSE_samplecomparison	RSE	RSE	File Name: BH_RSEE1_718.raw (F635456)	MAP7 domain-containing protein 1	MA7D1_HUMAN	Sprot_041812.fas	92820.2	0.998	2	2	3	0.000122	0.0357
07202012_AS_RSE_samplecomparison	RSE	RSE	File Name: BH_RSEE1_718.raw (F635456)	Splicing factor 3B subunit 1	SF3B1_HUMAN	Sprot_041812.fas	145835	0.998	2	2	4	0.000162	0.0376
07202012_AS_RSE_samplecomparison	RSE	RSE	File Name: BH_RSEE1_718.raw (F635456)	40S ribosomal protein S18	RS18_HUMAN	Sprot_041812.fas	17719.3	1	14	14	27	0.0011	0.625
07202012_AS_RSE_samplecomparison	RSE	RSE	File Name: BH_RSEE1_718.raw (F635456)	Keratin, type II cytoskeletal 5	K2C5_HUMAN	Sprot_041812.fas	62379.6	0.063	0	0	0	0	0
07202012_AS_RSE_samplecomparison	RSE	RSE	File Name: BH_RSEE1_718.raw (F635456)	Nucleolar RNA helicase 2	DDX21_HUMAN	Sprot_041812.fas	87346	1	41	47	85	0.00345	0.609
07202012_AS_RSE_samplecomparison	RSE	RSE	File Name: BH_RSEE1_718.raw (F635456)	Ras GTPase-activating protein-binding protein 2	G3BP2_HUMAN	Sprot_041812.fas	54120.3	1	5	5	9	0.000366	0.207
07202012_AS_RSE_samplecomparison	RSE	RSE	File Name: BH_RSEE1_718.raw (F635456)	60S ribosomal protein L6	RL6_HUMAN	Sprot_041812.fas	32729.3	1	21	26	52	0.00211	0.576
07202012_AS_RSE_samplecomparison	RSE	RSE	File Name: BH_RSEE1_718.raw (F635456)	Interleukin enhancer-binding factor 3	ILF3_HUMAN	Sprot_041812.fas	95338.9	1	31	36	72	0.00292	0.527
07202012_AS_RSE_samplecomparison	RSE	RSE	File Name: BH_RSEE1_718.raw (F635456)	40S ribosomal protein S14	RS14_HUMAN	Sprot_041812.fas	16272.9	1	11	18	40	0.00162	0.735
07202012_AS_RSE_samplecomparison	RSE	RSE	File Name: BH_RSEE1_718.raw (F635456)	Actin, cytoplasmic 1	ACTB_HUMAN,ACTG_HUMAN	Sprot_041812.fas	41737.8	1	9	10	18	0.000731	0.4
07202012_AS_RSE_samplecomparison	RSE	RSE	File Name: BH_RSEE1_718.raw (F635456)	60S ribosomal protein L19	RL19_HUMAN	Sprot_041812.fas	23467.4	1	10	14	23	0.000934	0.367
07202012_AS_RSE_samplecomparison	RSE	RSE	File Name: BH_RSEE1_718.raw (F635456)	60S ribosomal protein L28	RL28_HUMAN	Sprot_041812.fas	15747.9	1	10	12	18	0.000731	0.518
07202012_AS_RSE_samplecomparison	RSE	RSE	File Name: BH_RSEE1_718.raw (F635456)	40S ribosomal protein S2	RS2_HUMAN	Sprot_041812.fas	31325.2	1	15	20	39	0.00158	0.512
07202012_AS_RSE_samplecomparison	RSE	RSE	File Name: BH_RSEE1_718.raw (F635456)	Double-stranded RNA-specific adenosine deaminase	DSRAD_HUMAN	Sprot_041812.fas	136070	1	3	3	4	0.000162	0.0351
07202012_AS_RSE_samplecomparison	RSE	RSE	File Name: BH_RSEE1_718.raw (F635456)	Ras GTPase-activating protein-binding protein 1	G3BP1_HUMAN	Sprot_041812.fas	52162.8	1	9	10	13	0.000528	0.388
07202012_AS_RSE_samplecomparison	RSE	RSE	File Name: BH_RSEE1_718.raw (F635456)	Complement component 1 Q subcomponent-binding protein, mitochondrial	C1QBP_HUMAN	Sprot_041812.fas	31362.6	1	3	3	7	0.000284	0.255
07202012_AS_RSE_samplecomparison	RSE	RSE	File Name: BH_RSEE1_718.raw (F635456)	Heterogeneous nuclear ribonucleoprotein A3	ROA3_HUMAN	Sprot_041812.fas	39595.1	1	3	3	5	0.000203	0.151
07202012_AS_RSE_samplecomparison	RSE	RSE	File Name: BH_RSEE1_718.raw (F635456)	40S ribosomal protein S3a	RS3A_HUMAN	Sprot_041812.fas	29945.3	1	21	25	43	0.00175	0.648
07202012_AS_RSE_samplecomparison	RSE	RSE	File Name: BH_RSEE1_718.raw (F635456)	60S ribosomal protein L5	RL5_HUMAN	Sprot_041812.fas	34363.5	1	20	26	41	0.00167	0.697
07202012_AS_RSE_samplecomparison	RSE	RSE	File Name: BH_RSEE1_718.raw (F635456)	Glyceraldehyde-3-phosphate dehydrogenase	G3P_HUMAN	Sprot_041812.fas	36053.4	1	9	10	17	0.00069	0.507
07202012_AS_RSE_samplecomparison	RSE	RSE	File Name: BH_RSEE1_718.raw (F635456)	La-related protein 4	LARP4_HUMAN	Sprot_041812.fas	80596.3	1	3	3	5	0.000203	0.0677
07202012_AS_RSE_samplecomparison	RSE	RSE	File Name: BH_RSEE1_718.raw (F635456)	60S ribosomal protein L18	RL18_HUMAN	Sprot_041812.fas	21635.2	1	11	13	24	0.000975	0.441
07202012_AS_RSE_samplecomparison	RSE	RSE	File Name: BH_RSEE1_718.raw (F635456)	Pyruvate kinase isozymes M1/M2	KPYM_HUMAN	Sprot_041812.fas	57937.5	1	4	4	5	0.000203	0.16
07202012_AS_RSE_samplecomparison	RSE	RSE	File Name: BH_RSEE1_718.raw (F635456)	40S ribosomal protein S27	RS27_HUMAN	Sprot_041812.fas	9460.9	1	4	4	7	0.000284	0.417
07202012_AS_RSE_samplecomparison	RSE	RSE	File Name: BH_RSEE1_718.raw (F635456)	Nuclear cap-binding protein subunit 1	NCBP1_HUMAN	Sprot_041812.fas	91841.1	1	5	6	11	0.000447	0.123
07202012_AS_RSE_samplecomparison	RSE	RSE	File Name: BH_RSEE1_718.raw (F635456)	60S ribosomal protein L17	RL17_HUMAN	Sprot_041812.fas	21397.4	1	8	12	20	0.000812	0.5
07202012_AS_RSE_samplecomparison	RSE	RSE	File Name: BH_RSEE1_718.raw (F635456)	Eukaryotic translation initiation factor 3 subunit I	EIF3I_HUMAN	Sprot_041812.fas	36502	1	3	3	3	0.000122	0.246
07202012_AS_RSE_samplecomparison	RSE	RSE	File Name: BH_RSEE1_718.raw (F635456)	Histone H1x	H1X_HUMAN	Sprot_041812.fas	22487.9	1	3	3	4	0.000162	0.174
07202012_AS_RSE_samplecomparison	RSE	RSE	File Name: BH_RSEE1_718.raw (F635456)	14-3-3 protein gamma	1433G_HUMAN	Sprot_041812.fas	28303.1	1	4	5	9	0.000366	0.377
07202012_AS_RSE_samplecomparison	RSE	RSE	File Name: BH_RSEE1_718.raw (F635456)	Bifunctional glutamate/proline--tRNA ligase	SYEP_HUMAN	Sprot_041812.fas	170593	1	2	3	6	0.000244	0.0344
07202012_AS_RSE_samplecomparison	RSE	RSE	File Name: BH_RSEE1_718.raw (F635456)	Heterogeneous nuclear ribonucleoproteins A2/B1	ROA2_HUMAN	Sprot_041812.fas	37430.3	1	6	6	6	0.000244	0.235
07202012_AS_RSE_samplecomparison	RSE	RSE	File Name: BH_RSEE1_718.raw (F635456)	Phosphoglycerate mutase 1	PGAM1_HUMAN	Sprot_041812.fas	28804.8	1	3	3	3	0.000122	0.173
07202012_AS_RSE_samplecomparison	RSE	RSE	File Name: BH_RSEE1_718.raw (F635456)	Matrin-3	MATR3_HUMAN	Sprot_041812.fas	94626.7	1	23	30	62	0.00252	0.432
07202012_AS_RSE_samplecomparison	RSE	RSE	File Name: BH_RSEE1_718.raw (F635456)	La-related protein 4B	LAR4B_HUMAN	Sprot_041812.fas	80553.1	1	7	7	9	0.000366	0.144
07202012_AS_RSE_samplecomparison	RSE	RSE	File Name: BH_RSEE1_718.raw (F635456)	ATP-dependent RNA helicase A	DHX9_HUMAN	Sprot_041812.fas	140962	1	35	40	71	0.00288	0.404
07202012_AS_RSE_samplecomparison	RSE	RSE	File Name: BH_RSEE1_718.raw (F635456)	Nuclease-sensitive element-binding protein 1	YBOX1_HUMAN	Sprot_041812.fas	35923.8	1	12	22	112	0.00455	0.605
07202012_AS_RSE_samplecomparison	RSE	RSE	File Name: BH_RSEE1_718.raw (F635456)	40S ribosomal protein S17-like	RS17L_HUMAN,RS17_HUMAN	Sprot_041812.fas	15550.5	1	9	14	29	0.00118	0.637
07202012_AS_RSE_samplecomparison	RSE	RSE	File Name: BH_RSEE1_718.raw (F635456)	RuvB-like 2	RUVB2_HUMAN	Sprot_041812.fas	51158.1	0.998	2	2	2	8.12e-05	0.0475
07202012_AS_RSE_samplecomparison	RSE	RSE	File Name: BH_RSEE1_718.raw (F635456)	60S ribosomal protein L37a	RL37A_HUMAN	Sprot_041812.fas	10275.4	1	4	5	16	0.00065	0.424
07202012_AS_RSE_samplecomparison	RSE	RSE	File Name: BH_RSEE1_718.raw (F635456)	40S ribosomal protein S26	RS26_HUMAN	Sprot_041812.fas	13015.5	1	4	7	10	0.000406	0.443
07202012_AS_RSE_samplecomparison	RSE	RSE	File Name: BH_RSEE1_718.raw (F635456)	Protein PRRC2A	PRC2A_HUMAN	Sprot_041812.fas	228866	1	11	12	18	0.000731	0.112
07202012_AS_RSE_samplecomparison	RSE	RSE	File Name: BH_RSEE1_718.raw (F635456)	Hemoglobin subunit beta	HBB_HUMAN	Sprot_041812.fas	15998	1	3	3	6	0.000244	0.286
07202012_AS_RSE_samplecomparison	RSE	RSE	File Name: BH_RSEE1_718.raw (F635456)	Eukaryotic translation initiation factor 4 gamma 1	IF4G1_HUMAN	Sprot_041812.fas	175494	1	10	10	12	0.000487	0.113
07202012_AS_RSE_samplecomparison	RSE	RSE	File Name: BH_RSEE1_718.raw (F635456)	RNA-binding protein Musashi homolog 2	MSI2H_HUMAN	Sprot_041812.fas	35196.8	0.998	2	2	2	8.12e-05	0.137
07202012_AS_RSE_samplecomparison	RSE	RSE	File Name: BH_RSEE1_718.raw (F635456)	Interleukin enhancer-binding factor 2	ILF2_HUMAN	Sprot_041812.fas	43062.7	1	20	26	50	0.00203	0.759
07202012_AS_RSE_samplecomparison	RSE	RSE	File Name: BH_RSEE1_718.raw (F635456)	RNA-binding protein 14	RBM14_HUMAN	Sprot_041812.fas	69492.3	1	5	5	13	0.000528	0.127
07202012_AS_RSE_samplecomparison	RSE	RSE	File Name: BH_RSEE1_718.raw (F635456)	60S ribosomal protein L27	RL27_HUMAN	Sprot_041812.fas	15798.4	1	6	8	14	0.000569	0.471
07202012_AS_RSE_samplecomparison	RSE	RSE	File Name: BH_RSEE1_718.raw (F635456)	Putative helicase MOV-10	MOV10_HUMAN	Sprot_041812.fas	113676	1	4	4	7	0.000284	0.0518
07202012_AS_RSE_samplecomparison	RSE	RSE	File Name: BH_RSEE1_718.raw (F635456)	CDT1_HUMAN-R	CDT1_HUMAN-R		0	0.998	2	2	2	8.12e-05	0
07202012_AS_RSE_samplecomparison	RSE	RSE	File Name: BH_RSEE1_718.raw (F635456)	Ribosomal L1 domain-containing protein 1	RL1D1_HUMAN	Sprot_041812.fas	54974.7	1	22	29	46	0.00187	0.52
07202012_AS_RSE_samplecomparison	RSE	RSE	File Name: BH_RSEE1_718.raw (F635456)	La-related protein 1	LARP1_HUMAN	Sprot_041812.fas	123513	1	30	35	59	0.0024	0.456
07202012_AS_RSE_samplecomparison	RSE	RSE	File Name: BH_RSEE1_718.raw (F635456)	YTH domain family protein 2	YTHD2_HUMAN	Sprot_041812.fas	62334.4	1	6	6	8	0.000325	0.235
07202012_AS_RSE_samplecomparison	RSE	RSE	File Name: BH_RSEE1_718.raw (F635456)	60S ribosomal protein L36a	RL36A_HUMAN	Sprot_041812.fas	12441.1	1	7	8	9	0.000366	0.443
07202012_AS_RSE_samplecomparison	RSE	RSE	File Name: BH_RSEE1_718.raw (F635456)	Pre-mRNA-processing-splicing factor 8	PRP8_HUMAN	Sprot_041812.fas	273609	0.998	2	2	3	0.000122	0.0206
07202012_AS_RSE_samplecomparison	RSE	RSE	File Name: BH_RSEE1_718.raw (F635456)	Histone H2A type 1-B/E	H2A1B_HUMAN,H2A1C_HUMAN,H2A1D_HUMAN,H2A1H_HUMAN,H2A1J_HUMAN,H2A1_HUMAN,H2A2A_HUMAN,H2A2C_HUMAN,H2A3_HUMAN,H2AJ_HUMAN	Sprot_041812.fas	14136.1	0.998	2	3	6	0.000244	0.215
07202012_AS_RSE_samplecomparison	RSE	RSE	File Name: BH_RSEE1_718.raw (F635456)	Histone H4	H4_HUMAN	Sprot_041812.fas	11367.7	1	5	6	12	0.000487	0.515
07202012_AS_RSE_samplecomparison	RSE	RSE	File Name: BH_RSEE1_718.raw (F635456)	60S ribosomal protein L36	RL36_HUMAN	Sprot_041812.fas	12254.2	1	6	9	15	0.000609	0.419
07202012_AS_RSE_samplecomparison	RSE	RSE	File Name: BH_RSEE1_718.raw (F635456)	Pre-mRNA-processing factor 19	PRP19_HUMAN	Sprot_041812.fas	55181.3	1	6	6	8	0.000325	0.167
07202012_AS_RSE_samplecomparison	RSE	RSE	File Name: BH_RSEE1_718.raw (F635456)	Small nuclear ribonucleoprotein Sm D1	SMD1_HUMAN	Sprot_041812.fas	13281.9	1	3	5	8	0.000325	0.454
07202012_AS_RSE_samplecomparison	RSE	RSE	File Name: BH_RSEE1_718.raw (F635456)	Nucleolin	NUCL_HUMAN	Sprot_041812.fas	76615.9	1	14	15	26	0.00106	0.315
07202012_AS_RSE_samplecomparison	RSE	RSE	File Name: BH_RSEE1_718.raw (F635456)	Coiled-coil domain-containing protein 124	CC124_HUMAN	Sprot_041812.fas	25835.7	1	3	3	3	0.000122	0.161
07202012_AS_RSE_samplecomparison	RSE	RSE	File Name: BH_RSEE1_718.raw (F635456)	60S ribosomal protein L35a	RL35A_HUMAN	Sprot_041812.fas	12538.1	1	7	7	12	0.000487	0.445
07202012_AS_RSE_samplecomparison	RSE	RSE	File Name: BH_RSEE1_718.raw (F635456)	60S ribosomal protein L18a	RL18A_HUMAN	Sprot_041812.fas	20762.6	1	15	21	37	0.0015	0.585
07202012_AS_RSE_samplecomparison	RSE	RSE	File Name: BH_RSEE1_718.raw (F635456)	THO complex subunit 4	THOC4_HUMAN	Sprot_041812.fas	26888.7	1	3	3	5	0.000203	0.272
07202012_AS_RSE_samplecomparison	RSE	RSE	File Name: BH_RSEE1_718.raw (F635456)	mRNA-decapping enzyme 1A	DCP1A_HUMAN	Sprot_041812.fas	63310.1	0.5	1	2	3	0.000122	0.0533
07202012_AS_RSE_samplecomparison	RSE	RSE	File Name: BH_RSEE1_718.raw (F635456)	H/ACA ribonucleoprotein complex subunit 4	DKC1_HUMAN	Sprot_041812.fas	57675.2	0.999	1	1	1	4.06e-05	0.0467
07202012_AS_RSE_samplecomparison	RSE	RSE	File Name: BH_RSEE1_718.raw (F635456)	60S ribosomal protein L26	RL26_HUMAN	Sprot_041812.fas	17258.4	1	9	11	20	0.000812	0.566
07202012_AS_RSE_samplecomparison	RSE	RSE	File Name: BH_RSEE1_718.raw (F635456)	Eukaryotic translation initiation factor 3 subunit H	EIF3H_HUMAN	Sprot_041812.fas	39930.6	1	4	5	7	0.000284	0.253
07202012_AS_RSE_samplecomparison	RSE	RSE	File Name: BH_RSEE1_718.raw (F635456)	Tubulin beta chain	TBB5_HUMAN	Sprot_041812.fas	49670.6	1	28	37	80	0.00325	0.802
07202012_AS_RSE_samplecomparison	RSE	RSE	File Name: BH_RSEE1_718.raw (F635456)	Proliferation-associated protein 2G4	PA2G4_HUMAN	Sprot_041812.fas	43786.7	1	7	7	13	0.000528	0.317
07202012_AS_RSE_samplecomparison	RSE	RSE	File Name: BH_RSEE1_718.raw (F635456)	Heterogeneous nuclear ribonucleoprotein A1	ROA1_HUMAN	Sprot_041812.fas	38747	1	6	7	11	0.000447	0.293
07202012_AS_RSE_samplecomparison	RSE	RSE	File Name: BH_RSEE1_718.raw (F635456)	Peroxiredoxin-1	PRDX1_HUMAN	Sprot_041812.fas	22110.9	0.999	2	3	3	0.000122	0.221
07202012_AS_RSE_samplecomparison	RSE	RSE	File Name: BH_RSEE1_718.raw (F635456)	T-complex protein 1 subunit gamma	TCPG_HUMAN	Sprot_041812.fas	60535.4	0.999	2	2	2	8.12e-05	0.0771
07202012_AS_RSE_samplecomparison	RSE	RSE	File Name: BH_RSEE1_718.raw (F635456)	Elongation factor 2	EF2_HUMAN	Sprot_041812.fas	95340.1	1	22	25	37	0.0015	0.402
07202012_AS_RSE_samplecomparison	RSE	RSE	File Name: BH_RSEE1_718.raw (F635456)	DNA-binding protein A	DBPA_HUMAN	Sprot_041812.fas	40089.4	1	21	27	58	0.00236	0.613
07202012_AS_RSE_samplecomparison	RSE	RSE	File Name: BH_RSEE1_718.raw (F635456)	Alpha-enolase	ENOA_HUMAN	Sprot_041812.fas	47170.2	1	9	9	12	0.000487	0.415
07202012_AS_RSE_samplecomparison	RSE	RSE	File Name: BH_RSEE1_718.raw (F635456)	Eukaryotic initiation factor 4A-III	IF4A3_HUMAN	Sprot_041812.fas	46872.4	1	3	3	4	0.000162	0.134
07202012_AS_RSE_samplecomparison	RSE	RSE	File Name: BH_RSEE1_718.raw (F635456)	Heterogeneous nuclear ribonucleoprotein R	HNRPR_HUMAN	Sprot_041812.fas	70943.9	1	19	21	37	0.0015	0.318
07202012_AS_RSE_samplecomparison	RSE	RSE	File Name: BH_RSEE1_718.raw (F635456)	40S ribosomal protein S25	RS25_HUMAN	Sprot_041812.fas	13743	1	6	6	9	0.000366	0.376
07202012_AS_RSE_samplecomparison	RSE	RSE	File Name: BH_RSEE1_718.raw (F635456)	14-3-3 protein epsilon	1433E_HUMAN	Sprot_041812.fas	29175	1	7	8	11	0.000447	0.427
07202012_AS_RSE_samplecomparison	RSE	RSE	File Name: BH_RSEE1_718.raw (F635456)	Heterogeneous nuclear ribonucleoprotein A0	ROA0_HUMAN	Sprot_041812.fas	30840.5	1	4	4	9	0.000366	0.22
07202012_AS_RSE_samplecomparison	RSE	RSE	File Name: BH_RSEE1_718.raw (F635456)	Tubulin alpha-1B chain	TBA1B_HUMAN	Sprot_041812.fas	50151.7	1	19	25	46	0.00187	0.601
07202012_AS_RSE_samplecomparison	RSE	RSE	File Name: BH_RSEE1_718.raw (F635456)	Interferon-induced, double-stranded RNA-activated protein kinase	E2AK2_HUMAN	Sprot_041812.fas	62097.1	1	6	7	10	0.000406	0.152
07202012_AS_RSE_samplecomparison	RSE	RSE	File Name: BH_RSEE1_718.raw (F635456)	40S ribosomal protein S15	RS15_HUMAN	Sprot_041812.fas	17040.8	1	7	10	26	0.00106	0.676
07202012_AS_RSE_samplecomparison	RSE	RSE	File Name: BH_RSEE1_718.raw (F635456)	Ubiquitin-40S ribosomal protein S27a	RS27A_HUMAN	Sprot_041812.fas	17965.6	1	5	7	11	0.000447	0.301
07202012_AS_RSE_samplecomparison	RSE	RSE	File Name: BH_RSEE1_718.raw (F635456)	60S ribosomal protein L35	RL35_HUMAN	Sprot_041812.fas	14552.5	1	6	9	17	0.00069	0.382
07202012_AS_RSE_samplecomparison	RSE	RSE	File Name: BH_RSEE1_718.raw (F635456)	60S ribosomal protein L3	RL3_HUMAN	Sprot_041812.fas	46109.5	1	22	31	51	0.00207	0.521
07202012_AS_RSE_samplecomparison	RSE	RSE	File Name: BH_RSEE1_718.raw (F635456)	60S ribosomal protein L38	RL38_HUMAN	Sprot_041812.fas	8218.5	1	5	9	18	0.000731	0.543
07202012_AS_RSE_samplecomparison	RSE	RSE	File Name: BH_RSEE1_718.raw (F635456)	40S ribosomal protein S5	RS5_HUMAN	Sprot_041812.fas	22877	1	13	19	36	0.00146	0.569
07202012_AS_RSE_samplecomparison	RSE	RSE	File Name: BH_RSEE1_718.raw (F635456)	Fructose-bisphosphate aldolase A	ALDOA_HUMAN	Sprot_041812.fas	39420.6	1	4	4	4	0.000162	0.187
07202012_AS_RSE_samplecomparison	RSE	RSE	File Name: BH_RSEE1_718.raw (F635456)	Inosine-5'-monophosphate dehydrogenase 2	IMDH2_HUMAN	Sprot_041812.fas	55806.5	0.5	1	1	2	8.12e-05	0.0837
07202012_AS_RSE_samplecomparison	RSE	RSE	File Name: BH_RSEE1_718.raw (F635456)	Keratin, type II cytoskeletal 1	K2C1_HUMAN	Sprot_041812.fas	66040.3	0.5	1	1	2	8.12e-05	0.0186
07202012_AS_RSE_samplecomparison	RSE	RSE	File Name: BH_RSEE1_718.raw (F635456)	40S ribosomal protein S9	RS9_HUMAN	Sprot_041812.fas	22592.5	1	13	13	18	0.000731	0.5
07202012_AS_RSE_samplecomparison	RSE	RSE	File Name: BH_RSEE1_718.raw (F635456)	40S ribosomal protein S16	RS16_HUMAN	Sprot_041812.fas	16445.9	1	11	16	36	0.00146	0.589
07202012_AS_RSE_samplecomparison	RSE	RSE	File Name: BH_RSEE1_718.raw (F635456)	Chromatin target of PRMT1 protein	CHTOP_HUMAN	Sprot_041812.fas	26397.8	1	3	5	7	0.000284	0.169
07202012_AS_RSE_samplecomparison	RSE	RSE	File Name: BH_RSEE1_718.raw (F635456)	60S ribosomal protein L34	RL34_HUMAN	Sprot_041812.fas	13293.1	1	5	5	8	0.000325	0.265
07202012_AS_RSE_samplecomparison	RSE	RSE	File Name: BH_RSEE1_718.raw (F635456)	RNA-binding motif protein, X chromosome	RBMX_HUMAN	Sprot_041812.fas	42333.7	1	10	12	19	0.000772	0.289
07202012_AS_RSE_samplecomparison	RSE	RSE	File Name: BH_RSEE1_718.raw (F635456)	TRMT1-like protein	TRM1L_HUMAN	Sprot_041812.fas	81748.4	0.998	2	2	2	8.12e-05	0.06
07202012_AS_RSE_samplecomparison	RSE	RSE	File Name: BH_RSEE1_718.raw (F635456)	ELAV-like protein 1	ELAV1_HUMAN	Sprot_041812.fas	36092.6	1	3	3	3	0.000122	0.147
07202012_AS_RSE_samplecomparison	RSE	RSE	File Name: BH_RSEE1_718.raw (F635456)	60S ribosomal protein L15	RL15_HUMAN	Sprot_041812.fas	24146.5	1	14	16	30	0.00122	0.5
07202012_AS_RSE_samplecomparison	RSE	RSE	File Name: BH_RSEE1_718.raw (F635456)	Heterogeneous nuclear ribonucleoprotein Q	HNRPQ_HUMAN	Sprot_041812.fas	69603.5	1	13	13	22	0.000894	0.38
07202012_AS_RSE_samplecomparison	RSE	RSE	File Name: BH_RSEE1_718.raw (F635456)	Stress-induced-phosphoprotein 1	STIP1_HUMAN	Sprot_041812.fas	62642.1	0.998	2	2	4	0.000162	0.0773
07202012_AS_RSE_samplecomparison	RSE	RSE	File Name: BH_RSEE1_718.raw (F635456)	Histone H2B type 1-C/E/F/G/I	H2B1C_HUMAN,H2B1D_HUMAN,H2B1H_HUMAN,H2B1K_HUMAN,H2B1L_HUMAN,H2B1M_HUMAN,H2B1N_HUMAN,H2B2F_HUMAN,H2BFS_HUMAN	Sprot_041812.fas	13906.6	1	5	6	9	0.000366	0.357
07202012_AS_RSE_samplecomparison	RSE	RSE	File Name: BH_RSEE1_718.raw (F635456)	40S ribosomal protein S20	RS20_HUMAN	Sprot_041812.fas	13373	1	5	6	10	0.000406	0.319
07202012_AS_RSE_samplecomparison	RSE	RSE	File Name: BH_RSEE1_718.raw (F635456)	40S ribosomal protein S24	RS24_HUMAN	Sprot_041812.fas	15423.8	1	6	9	16	0.00065	0.368
07202012_AS_RSE_samplecomparison	RSE	RSE	File Name: BH_RSEE1_718.raw (F635456)	SURP and G-patch domain-containing protein 2	SUGP2_HUMAN	Sprot_041812.fas	120211	1	10	10	13	0.000528	0.188
07202012_AS_RSE_samplecomparison	RSE	RSE	File Name: BH_RSEE1_718.raw (F635456)	Eukaryotic translation initiation factor 3 subunit F	EIF3F_HUMAN	Sprot_041812.fas	37563.5	0.999	2	3	3	0.000122	0.084
07202012_AS_RSE_samplecomparison	RSE	RSE	File Name: BH_RSEE1_718.raw (F635456)	Insulin-like growth factor 2 mRNA-binding protein 3	IF2B3_HUMAN	Sprot_041812.fas	63706	1	27	32	61	0.00248	0.511
07202012_AS_RSE_samplecomparison	RSE	RSE	File Name: BH_RSEE1_718.raw (F635456)	40S ribosomal protein S8	RS8_HUMAN	Sprot_041812.fas	24206.4	1	18	22	42	0.00171	0.62
07202012_AS_RSE_samplecomparison	RSE	RSE	File Name: BH_RSEE1_718.raw (F635456)	Eukaryotic translation initiation factor 3 subunit D	EIF3D_HUMAN	Sprot_041812.fas	63973.8	1	4	4	4	0.000162	0.128
07202012_AS_RSE_samplecomparison	RSE	RSE	File Name: BH_RSEE1_718.raw (F635456)	Poly [ADP-ribose] polymerase 1	PARP1_HUMAN	Sprot_041812.fas	113088	1	3	3	5	0.000203	0.0621
07202012_AS_RSE_samplecomparison	RSE	RSE	File Name: BH_RSEE1_718.raw (F635456)	Zinc finger protein 346	ZN346_HUMAN	Sprot_041812.fas	32932.4	0.5	1	1	1	4.06e-05	0.0442
07202012_AS_RSE_samplecomparison	RSE	RSE	File Name: BH_RSEE1_718.raw (F635456)	40S ribosomal protein SA	RSSA_HUMAN	Sprot_041812.fas	32854.1	1	14	19	37	0.0015	0.597
07202012_AS_RSE_samplecomparison	RSE	RSE	File Name: BH_RSEE1_718.raw (F635456)	ATP-dependent RNA helicase DDX18	DDX18_HUMAN	Sprot_041812.fas	75409.7	1	3	3	5	0.000203	0.0776
07202012_AS_RSE_samplecomparison	RSE	RSE	File Name: BH_RSEE1_718.raw (F635456)	Protein TFG	TFG_HUMAN	Sprot_041812.fas	43448.3	1	3	3	3	0.000122	0.235
07202012_AS_RSE_samplecomparison	RSE	RSE	File Name: BH_RSEE1_718.raw (F635456)	Heterogeneous nuclear ribonucleoprotein F	HNRPF_HUMAN	Sprot_041812.fas	45671.9	0.998	2	2	3	0.000122	0.164
07202012_AS_RSE_samplecomparison	RSE	RSE	File Name: BH_RSEE1_718.raw (F635456)	40S ribosomal protein S23	RS23_HUMAN	Sprot_041812.fas	15807.7	1	8	9	15	0.000609	0.531
07202012_AS_RSE_samplecomparison	RSE	RSE	File Name: BH_RSEE1_718.raw (F635456)	Superkiller viralicidic activity 2-like 2	SK2L2_HUMAN	Sprot_041812.fas	117808	0.998	2	2	2	8.12e-05	0.0336
07202012_AS_RSE_samplecomparison	RSE	RSE	File Name: BH_RSEE1_718.raw (F635456)	Transitional endoplasmic reticulum ATPase	TERA_HUMAN	Sprot_041812.fas	89324.8	1	3	4	4	0.000162	0.0806
07202012_AS_RSE_samplecomparison	RSE	RSE	File Name: BH_RSEE1_718.raw (F635456)	Eukaryotic translation initiation factor 3 subunit E	EIF3E_HUMAN	Sprot_041812.fas	52222.6	0.5	1	1	1	4.06e-05	0.0247
07202012_AS_RSE_samplecomparison	RSE	RSE	File Name: BH_RSEE1_718.raw (F635456)	Insulin-like growth factor 2 mRNA-binding protein 2	IF2B2_HUMAN	Sprot_041812.fas	66122.4	1	12	13	19	0.000772	0.352
07202012_AS_RSE_samplecomparison	RSE	RSE	File Name: BH_RSEE1_718.raw (F635456)	Histone H3.2	H32_HUMAN	Sprot_041812.fas	15388.7	1	2	4	11	0.000447	0.316
07202012_AS_RSE_samplecomparison	RSE	RSE	File Name: BH_RSEE1_718.raw (F635456)	60S ribosomal protein L13a	RL13A_HUMAN	Sprot_041812.fas	23577.9	1	10	12	20	0.000812	0.394
07202012_AS_RSE_samplecomparison	RSE	RSE	File Name: BH_RSEE1_718.raw (F635456)	60S ribosomal protein L23	RL23_HUMAN	Sprot_041812.fas	14865.9	1	10	13	21	0.000853	0.55
07202012_AS_RSE_samplecomparison	RSE	RSE	File Name: BH_RSEE1_718.raw (F635456)	Polyadenylate-binding protein 4	PABP4_HUMAN	Sprot_041812.fas	70783.8	1	20	30	57	0.00232	0.509
07202012_AS_RSE_samplecomparison	RSE	RSE	File Name: BH_RSEE1_718.raw (F635456)	Enhancer of rudimentary homolog	ERH_HUMAN	Sprot_041812.fas	12259.3	0.998	2	2	3	0.000122	0.308
07202012_AS_RSE_samplecomparison	RSE	RSE	File Name: BH_RSEE1_718.raw (F635456)	Heterogeneous nuclear ribonucleoprotein D-like	HNRDL_HUMAN	Sprot_041812.fas	46438.6	0.999	2	3	3	0.000122	0.0976
07202012_AS_RSE_samplecomparison	RSE	RSE	File Name: BH_RSEE1_718.raw (F635456)	Constitutive coactivator of PPAR-gamma-like protein 1	F120A_HUMAN	Sprot_041812.fas	121889	1	19	24	33	0.00134	0.286
07202012_AS_RSE_samplecomparison	RSE	RSE	File Name: BH_RSEE1_718.raw (F635456)	Probable ATP-dependent RNA helicase DDX17	DDX17_HUMAN	Sprot_041812.fas	80274	1	14	16	22	0.000894	0.217
07202012_AS_RSE_samplecomparison	RSE	RSE	File Name: BH_RSEE1_718.raw (F635456)	Histone H1.3	H13_HUMAN	Sprot_041812.fas	22351.3	1	7	9	16	0.00065	0.231
07202012_AS_RSE_samplecomparison	RSE	RSE	File Name: BH_RSEE1_718.raw (F635456)	40S ribosomal protein S13	RS13_HUMAN	Sprot_041812.fas	17223.3	1	11	13	22	0.000894	0.53
07202012_AS_RSE_samplecomparison	RSE	RSE	File Name: BH_RSEE1_718.raw (F635456)	Zinc finger protein 326	ZN326_HUMAN	Sprot_041812.fas	65653.5	1	6	6	6	0.000244	0.162
07202012_AS_RSE_samplecomparison	RSE	RSE	File Name: BH_RSEE1_718.raw (F635456)	Tubulin beta-4B chain	TBB4B_HUMAN	Sprot_041812.fas	49830.7	1	4	4	6	0.000244	0.757
07202012_AS_RSE_samplecomparison	RSE	RSE	File Name: BH_RSEE1_718.raw (F635456)	Probable ATP-dependent RNA helicase DDX5	DDX5_HUMAN	Sprot_041812.fas	69149.7	1	7	7	11	0.000447	0.269
07202012_AS_RSE_samplecomparison	RSE	RSE	File Name: BH_RSEE1_718.raw (F635456)	Eukaryotic initiation factor 4A-I	IF4A1_HUMAN	Sprot_041812.fas	46155.3	1	6	7	11	0.000447	0.259
07202012_AS_RSE_samplecomparison	RSE	RSE	File Name: BH_RSEE1_718.raw (F635456)	60S ribosomal protein L14	RL14_HUMAN	Sprot_041812.fas	23432.3	1	10	13	26	0.00106	0.423
07202012_AS_RSE_samplecomparison	RSE	RSE	File Name: BH_RSEE1_718.raw (F635456)	40S ribosomal protein S7	RS7_HUMAN	Sprot_041812.fas	22127.5	1	16	20	44	0.00179	0.737
07202012_AS_RSE_samplecomparison	RSE	RSE	File Name: BH_RSEE1_718.raw (F635456)	Zinc finger CCCH-type antiviral protein 1	ZCCHV_HUMAN	Sprot_041812.fas	101433	1	23	23	34	0.00138	0.356
07202012_AS_RSE_samplecomparison	RSE	RSE	File Name: BH_RSEE1_718.raw (F635456)	60S ribosomal protein L32	RL32_HUMAN	Sprot_041812.fas	15860.4	1	7	9	16	0.00065	0.489
07202012_AS_RSE_samplecomparison	RSE	RSE	File Name: BH_RSEE1_718.raw (F635456)	Ribonucleases P/MRP protein subunit POP1	POP1_HUMAN	Sprot_041812.fas	114710	1	3	3	6	0.000244	0.0742
07202012_AS_RSE_samplecomparison	RSE	RSE	File Name: BH_RSEE1_718.raw (F635456)	Poly(rC)-binding protein 2	PCBP2_HUMAN	Sprot_041812.fas	38580.9	1	9	10	22	0.000894	0.405
07202012_AS_RSE_samplecomparison	RSE	RSE	File Name: BH_RSEE1_718.raw (F635456)	Creatine kinase B-type	KCRB_HUMAN	Sprot_041812.fas	42645.1	1	4	4	5	0.000203	0.186
07202012_AS_RSE_samplecomparison	RSE	RSE	File Name: BH_RSEE1_718.raw (F635456)	60S ribosomal protein L4	RL4_HUMAN	Sprot_041812.fas	47699.1	1	26	38	71	0.00288	0.567
07202012_AS_RSE_samplecomparison	RSE	RSE	File Name: BH_RSEE1_718.raw (F635456)	60S ribosomal protein L13	RL13_HUMAN	Sprot_041812.fas	24262.2	1	11	13	22	0.000894	0.398
07202012_AS_RSE_samplecomparison	RSE	RSE	File Name: BH_RSEE1_718.raw (F635456)	D-3-phosphoglycerate dehydrogenase	SERA_HUMAN	Sprot_041812.fas	56650.6	1	3	3	4	0.000162	0.141
07202012_AS_RSE_samplecomparison	RSE	RSE	File Name: BH_RSEE1_718.raw (F635456)	Ubiquitin carboxyl-terminal hydrolase 10	UBP10_HUMAN	Sprot_041812.fas	87134.6	1	3	3	5	0.000203	0.084
07202012_AS_RSE_samplecomparison	RSE	RSE	File Name: BH_RSEE1_718.raw (F635456)	60S ribosomal protein L24	RL24_HUMAN	Sprot_041812.fas	17779.5	1	8	11	19	0.000772	0.395
07202012_AS_RSE_samplecomparison	RSE	RSE	File Name: BH_RSEE1_718.raw (F635456)	Heterogeneous nuclear ribonucleoprotein L	HNRPL_HUMAN	Sprot_041812.fas	64132.8	1	14	17	36	0.00146	0.497
07202012_AS_RSE_samplecomparison	RSE	RSE	File Name: BH_RSEE1_718.raw (F635456)	Insulin-like growth factor 2 mRNA-binding protein 1	IF2B1_HUMAN	Sprot_041812.fas	63480.5	1	53	81	221	0.00898	0.638
07202012_AS_RSE_samplecomparison	RSE	RSE	File Name: BH_RSEE1_718.raw (F635456)	40S ribosomal protein S6	RS6_HUMAN	Sprot_041812.fas	28681.7	1	16	23	33	0.00134	0.498
07202012_AS_RSE_samplecomparison	RSE	RSE	File Name: BH_RSEE1_718.raw (F635456)	14-3-3 protein beta/alpha	1433B_HUMAN	Sprot_041812.fas	28083.1	0.998	2	2	2	8.12e-05	0.309
07202012_AS_RSE_samplecomparison	RSE	RSE	File Name: BH_RSEE1_718.raw (F635456)	Small nuclear ribonucleoprotein E	RUXE_HUMAN	Sprot_041812.fas	10803.9	1	3	3	9	0.000366	0.565
07202012_AS_RSE_samplecomparison	RSE	RSE	File Name: BH_RSEE1_718.raw (F635456)	Heterogeneous nuclear ribonucleoprotein A/B	ROAA_HUMAN	Sprot_041812.fas	36225.2	1	5	5	7	0.000284	0.148
07202012_AS_RSE_samplecomparison	RSE	RSE	File Name: BH_RSEE1_718.raw (F635456)	40S ribosomal protein S12	RS12_HUMAN	Sprot_041812.fas	14514.8	1	10	13	23	0.000934	0.674
07202012_AS_RSE_samplecomparison	RSE	RSE	File Name: BH_RSEE1_718.raw (F635456)	Heterogeneous nuclear ribonucleoprotein D0	HNRPD_HUMAN	Sprot_041812.fas	38434.5	1	4	4	7	0.000284	0.135
07202012_AS_RSE_samplecomparison	RSE	RSE	File Name: BH_RSEE1_718.raw (F635456)	Melanoma-associated antigen D1	MAGD1_HUMAN	Sprot_041812.fas	86162.5	0.5	1	1	1	4.06e-05	0.0308
07202012_AS_RSE_samplecomparison	RSE	RSE	File Name: BH_RSEE1_718.raw (F635456)	40S ribosomal protein S21	RS21_HUMAN	Sprot_041812.fas	9111.6	1	6	8	15	0.000609	0.639
07202012_AS_RSE_samplecomparison	RSE	RSE	File Name: BH_RSEE1_718.raw (F635456)	Probable ATP-dependent RNA helicase DDX6	DDX6_HUMAN	Sprot_041812.fas	54418.6	1	2	2	5	0.000203	0.0745
07202012_AS_RSE_samplecomparison	RSE	RSE	File Name: BH_RSEE1_718.raw (F635456)	Protein-L-isoaspartate(D-aspartate) O-methyltransferase	PIMT_HUMAN	Sprot_041812.fas	24636.8	1	7	10	14	0.000569	0.617
07202012_AS_RSE_samplecomparison	RSE	RSE	File Name: BH_RSEE1_718.raw (F635456)	60S acidic ribosomal protein P0	RLA0_HUMAN	Sprot_041812.fas	34274.3	1	15	17	33	0.00134	0.782
07202012_AS_RSE_samplecomparison	RSE	RSE	File Name: BH_RSEE1_718.raw (F635456)	Lupus La protein	LA_HUMAN	Sprot_041812.fas	46839	1	4	4	5	0.000203	0.113
07202012_AS_RSE_samplecomparison	RSE	RSE	File Name: BH_RSEE1_718.raw (F635456)	RNA-binding protein FUS	FUS_HUMAN	Sprot_041812.fas	53426	1	3	3	4	0.000162	0.0894
07202012_AS_RSE_samplecomparison	RSE	RSE	File Name: BH_RSEE1_718.raw (F635456)	Polyadenylate-binding protein 2	PABP2_HUMAN	Sprot_041812.fas	32749.5	1	4	4	7	0.000284	0.278
07202012_AS_RSE_samplecomparison	RSE	RSE	File Name: BH_RSEE1_718.raw (F635456)	Heterogeneous nuclear ribonucleoprotein U-like protein 2	HNRL2_HUMAN	Sprot_041812.fas	85105.2	1	4	4	5	0.000203	0.0977
07202012_AS_RSE_samplecomparison	RSE	RSE	File Name: BH_RSEE1_718.raw (F635456)	60S ribosomal protein L10a	RL10A_HUMAN	Sprot_041812.fas	24832	1	7	11	14	0.000569	0.456
07202012_AS_RSE_samplecomparison	RSE	RSE	File Name: BH_RSEE1_718.raw (F635456)	40S ribosomal protein S11	RS11_HUMAN	Sprot_041812.fas	18431.3	1	11	14	25	0.00102	0.62
07202012_AS_RSE_samplecomparison	RSE	RSE	File Name: BH_RSEE1_718.raw (F635456)	60S ribosomal protein L22	RL22_HUMAN	Sprot_041812.fas	14787.3	1	8	9	18	0.000731	0.625
07202012_AS_RSE_samplecomparison	RSE	RSE	File Name: BH_RSEE1_718.raw (F635456)	Glutathione S-transferase P	GSTP1_HUMAN	Sprot_041812.fas	23356.7	0.998	2	2	2	8.12e-05	0.129
07202012_AS_RSE_samplecomparison	RSE	RSE	File Name: BH_RSEE1_718.raw (F635456)	60S ribosomal protein L31	RL31_HUMAN	Sprot_041812.fas	14463.2	1	3	3	3	0.000122	0.32
07202012_AS_RSE_samplecomparison	RSE	RSE	File Name: BH_RSEE1_718.raw (F635456)	Fatty acid synthase	FAS_HUMAN	Sprot_041812.fas	273427	0.998	2	2	5	0.000203	0.0199
07202012_AS_RSE_samplecomparison	RSE	RSE	File Name: BH_RSEE1_718.raw (F635456)	60S ribosomal protein L9	RL9_HUMAN	Sprot_041812.fas	21863.7	1	11	13	21	0.000853	0.714
07202012_AS_RSE_samplecomparison	RSE	RSE	File Name: BH_RSEE1_718.raw (F635456)	E3 ubiquitin-protein ligase TRIM21	RO52_HUMAN	Sprot_041812.fas	54169.5	1	4	4	4	0.000162	0.162
07202012_AS_RSE_samplecomparison	RSE	RSE	File Name: BH_RSEE1_718.raw (F635456)	X-ray repair cross-complementing protein 5	XRCC5_HUMAN	Sprot_041812.fas	82707.1	1	3	3	3	0.000122	0.0806
07202012_AS_RSE_samplecomparison	RSE	RSE	File Name: BH_RSEE1_718.raw (F635456)	Heterogeneous nuclear ribonucleoprotein U-like protein 1	HNRL1_HUMAN	Sprot_041812.fas	95739.7	1	11	12	19	0.000772	0.221
07202012_AS_RSE_samplecomparison	RSE	RSE	File Name: BH_RSEE1_718.raw (F635456)	Polypyrimidine tract-binding protein 1	PTBP1_HUMAN	Sprot_041812.fas	57222.5	1	11	12	17	0.00069	0.458
07202012_AS_RSE_samplecomparison	RSE	RSE	File Name: BH_RSEE1_718.raw (F635456)	60S ribosomal protein L12	RL12_HUMAN	Sprot_041812.fas	17819.1	1	7	8	18	0.000731	0.588
07202012_AS_RSE_samplecomparison	RSE	RSE	File Name: BH_RSEE1_718.raw (F635456)	Protein LSM12 homolog	LSM12_HUMAN	Sprot_041812.fas	21700.4	0.998	2	2	2	8.12e-05	0.138
07202012_AS_RSE_samplecomparison	RSE	RSE	File Name: BH_RSEE1_718.raw (F635456)	40S ribosomal protein S4, X isoform	RS4X_HUMAN	Sprot_041812.fas	29599.3	1	19	25	47	0.00191	0.669
07202012_AS_RSE_samplecomparison	RSE	RSE	File Name: BH_RSEE1_718.raw (F635456)	Heterogeneous nuclear ribonucleoprotein M	HNRPM_HUMAN	Sprot_041812.fas	77517.3	1	46	57	130	0.00528	0.742
07202012_AS_RSE_samplecomparison	RSE	RSE	File Name: BH_RSEE1_718.raw (F635456)	60S ribosomal protein L21	RL21_HUMAN	Sprot_041812.fas	18565	1	8	9	17	0.00069	0.519
07202012_AS_RSE_samplecomparison	RSE	RSE	File Name: BH_RSEE1_718.raw (F635456)	Glutamate-rich WD repeat-containing protein 1	GRWD1_HUMAN	Sprot_041812.fas	49418.4	0.5	1	1	2	8.12e-05	0.0471
07202012_AS_RSE_samplecomparison	RSE	RSE	File Name: BH_RSEE1_718.raw (F635456)	60S ribosomal protein L27a	RL27A_HUMAN	Sprot_041812.fas	16561.4	1	5	8	17	0.00069	0.331
07202012_AS_RSE_samplecomparison	RSE	RSE	File Name: BH_RSEE1_718.raw (F635456)	Heat shock 70 kDa protein 1A/1B	HSP71_HUMAN	Sprot_041812.fas	70054	1	33	42	84	0.00341	0.633
07202012_AS_RSE_samplecomparison	RSE	RSE	File Name: BH_RSEE1_718.raw (F635456)	40S ribosomal protein S30	RS30_HUMAN	Sprot_041812.fas	6647.9	0.998	2	2	5	0.000203	0.186
07202012_AS_RSE_samplecomparison	RSE	RSE	File Name: BH_RSEE1_718.raw (F635456)	Arginine--tRNA ligase, cytoplasmic	SYRC_HUMAN	Sprot_041812.fas	75382	0.998	2	2	2	8.12e-05	0.0409
07202012_AS_RSE_samplecomparison	RSE	RSE	File Name: BH_RSEE1_718.raw (F635456)	High mobility group protein B1	HMGB1_HUMAN	Sprot_041812.fas	24894.7	0.998	2	2	2	8.12e-05	0.144
07202012_AS_RSE_samplecomparison	RSE	RSE	File Name: BH_RSEE1_718.raw (F635456)	Protein CASC3	CASC3_HUMAN	Sprot_041812.fas	76277.9	0.998	2	2	2	8.12e-05	0.0384
07202012_AS_RSE_samplecomparison	RSE	RSE	File Name: BH_RSEE1_718.raw (F635456)	Triosephosphate isomerase	TPIS_HUMAN	Sprot_041812.fas	30790.8	1	3	3	4	0.000162	0.185
07202012_AS_RSE_samplecomparison	RSE	RSE	File Name: BH_RSEE1_718.raw (F635456)	Peptidyl-prolyl cis-trans isomerase A	PPIA_HUMAN	Sprot_041812.fas	18012.9	0.998	2	2	4	0.000162	0.248
07202012_AS_RSE_samplecomparison	RSE	RSE	File Name: BH_RSEE1_718.raw (F635456)	Heat shock protein HSP 90-beta	HS90B_HUMAN	Sprot_041812.fas	83267.3	1	17	19	33	0.00134	0.331
07202012_AS_RSE_samplecomparison	RSE	RSE	File Name: BH_RSEE1_718.raw (F635456)	Guanine nucleotide-binding protein subunit beta-2-like 1	GBLP_HUMAN	Sprot_041812.fas	35077	1	19	25	47	0.00191	0.691
07202012_AS_RSE_samplecomparison	RSE	RSE	File Name: BH_RSEE1_718.raw (F635456)	Nucleoside diphosphate kinase A	NDKA_HUMAN	Sprot_041812.fas	17148.8	0.998	2	3	4	0.000162	0.237
07202012_AS_RSE_samplecomparison	RSE	RSE	File Name: BH_RSEE1_718.raw (F635456)	Heterogeneous nuclear ribonucleoproteins C1/C2	HNRPC_HUMAN	Sprot_041812.fas	33670.5	1	14	18	36	0.00146	0.507
07202012_AS_RSE_samplecomparison	RSE	RSE	File Name: BH_RSEE1_718.raw (F635456)	60S ribosomal protein L11	RL11_HUMAN	Sprot_041812.fas	20253.2	1	6	9	16	0.00065	0.315
07202012_AS_RSE_samplecomparison	RSE	RSE	File Name: BH_RSEE1_718.raw (F635456)	Double-stranded RNA-binding protein Staufen homolog 2	STAU2_HUMAN	Sprot_041812.fas	62641.9	0.999	2	2	2	8.12e-05	0.0632
07202012_AS_RSE_samplecomparison	RSE	RSE	File Name: BH_RSEE1_718.raw (F635456)	DnaJ homolog subfamily A member 2	DNJA2_HUMAN	Sprot_041812.fas	45745.7	1	3	3	4	0.000162	0.184
07202012_AS_RSE_samplecomparison	RSE	RSE	File Name: BH_RSEE1_718.raw (F635456)	Eukaryotic translation initiation factor 3 subunit B	EIF3B_HUMAN	Sprot_041812.fas	92482.8	1	4	4	7	0.000284	0.117
07202012_AS_RSE_samplecomparison	RSE	RSE	File Name: BH_RSEE1_718.raw (F635456)	Eukaryotic translation initiation factor 3 subunit L	EIF3L_HUMAN	Sprot_041812.fas	66729.3	0.999	2	2	3	0.000122	0.0638
07202012_AS_RSE_samplecomparison	RSE	RSE	File Name: BH_RSEE1_718.raw (F635456)	Cofilin-1	COF1_HUMAN	Sprot_041812.fas	18503.2	0.998	2	2	3	0.000122	0.235
07202012_AS_RSE_samplecomparison	RSE	RSE	File Name: BH_RSEE1_718.raw (F635456)	Polyadenylate-binding protein 1	PABP1_HUMAN	Sprot_041812.fas	70671.3	1	50	78	186	0.00755	0.659
07202012_AS_RSE_samplecomparison	RSE	RSE	File Name: BH_RSEE1_718.raw (F635456)	14-3-3 protein theta	1433T_HUMAN	Sprot_041812.fas	27765.4	1	4	4	6	0.000244	0.408
07202012_AS_RSE_samplecomparison	RSE	RSE	File Name: BH_RSEE1_718.raw (F635456)	YTH domain family protein 1	YTHD1_HUMAN	Sprot_041812.fas	60872.9	1	4	4	4	0.000162	0.2
07202012_AS_RSE_samplecomparison	RSE	RSE	File Name: BH_RSEE1_718.raw (F635456)	Importin subunit alpha-2	IMA2_HUMAN	Sprot_041812.fas	57862.5	1	3	3	6	0.000244	0.132
07202012_AS_RSE_samplecomparison	RSE	RSE	File Name: BH_RSEE1_718.raw (F635456)	14-3-3 protein zeta/delta	1433Z_HUMAN	Sprot_041812.fas	27745.9	1	7	8	8	0.000325	0.465
07202012_AS_RSE_samplecomparison	RSE	RSE	File Name: BH_RSEE1_718.raw (F635456)	60 kDa heat shock protein, mitochondrial	CH60_HUMAN	Sprot_041812.fas	61055.7	1	3	5	9	0.000366	0.162
07202012_AS_RSE_samplecomparison	RSE	RSE	File Name: BH_RSEE1_718.raw (F635456)	Double-stranded RNA-binding protein Staufen homolog 1	STAU1_HUMAN	Sprot_041812.fas	63183.1	1	6	7	10	0.000406	0.156
07202012_AS_RSE_samplecomparison	RSE	RSE	File Name: BH_RSEE1_718.raw (F635456)	Putative ATP-dependent RNA helicase DHX30	DHX30_HUMAN	Sprot_041812.fas	133942	1	3	3	3	0.000122	0.0419
07202012_AS_RSE_samplecomparison	RSE	RSE	File Name: BH_RSEE1_718.raw (F635456)	60S ribosomal protein L30	RL30_HUMAN	Sprot_041812.fas	12784.7	1	9	13	25	0.00102	0.739
07202012_AS_RSE_samplecomparison	RSE	RSE	File Name: BH_RSEE1_718.raw (F635456)	DnaJ homolog subfamily A member 1	DNJA1_HUMAN	Sprot_041812.fas	44868.6	1	3	3	6	0.000244	0.171
07202012_AS_RSE_samplecomparison	RSE	RSE	File Name: BH_RSEE1_718.raw (F635456)	60S ribosomal protein L8	RL8_HUMAN	Sprot_041812.fas	28024.8	1	19	24	31	0.00126	0.623
07202012_AS_RSE_samplecomparison	RSE	RSE	File Name: BH_RSEE1_718.raw (F635456)	40S ribosomal protein S19	RS19_HUMAN	Sprot_041812.fas	16060.5	1	10	15	22	0.000894	0.559
END OF FILE
