# Supplementary figures and images for: Polypyrimidine tract binding protein 1 protects mRNAs from recognition by the nonsense-mediated mRNA decay pathway
Source: eLife journal article supplement (doi:10.7554/elife.11155), 2016-01-08

A

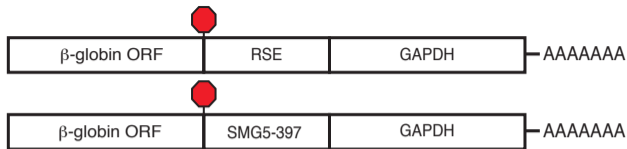

B

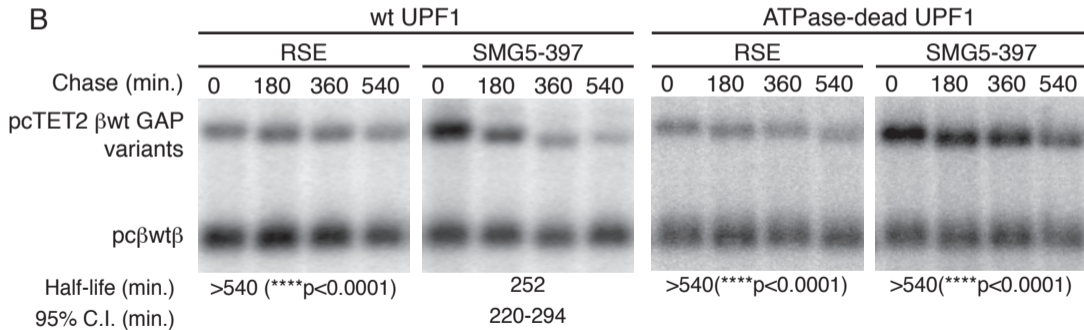

Supplement: supp [file elife-11155-supp-v1.zip]

# MAPK1

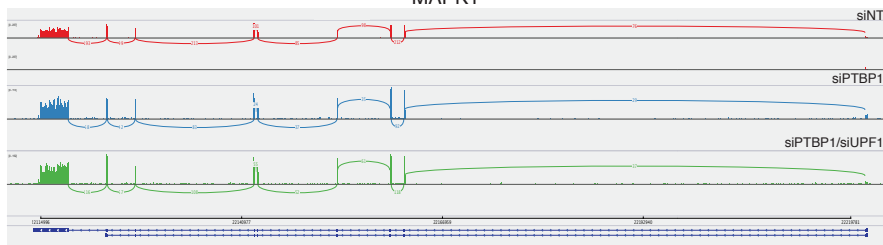

# PNP

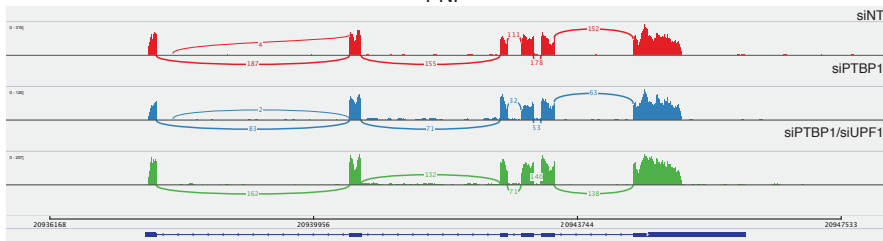

# SLC41A3

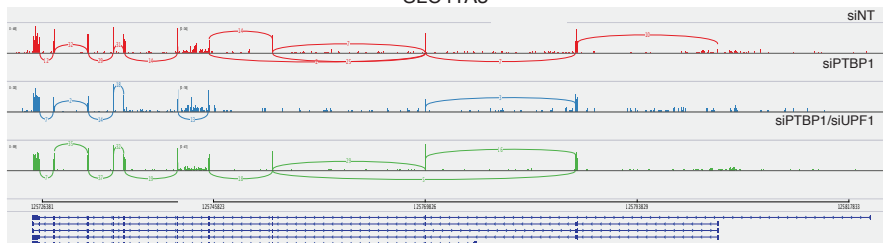

# SNAP23

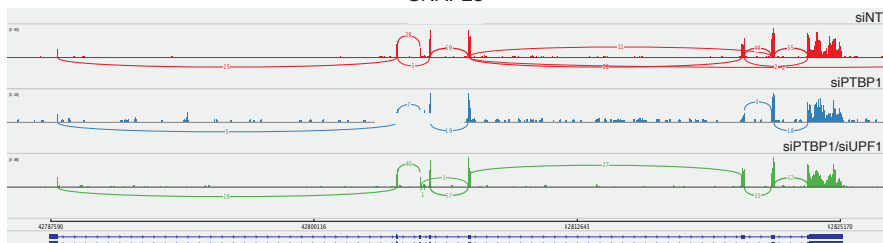

# TPM1

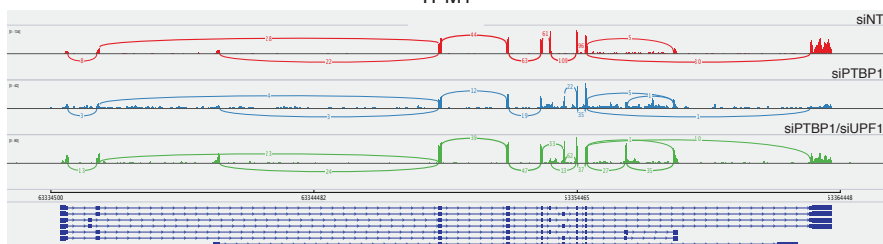

# TRIM4

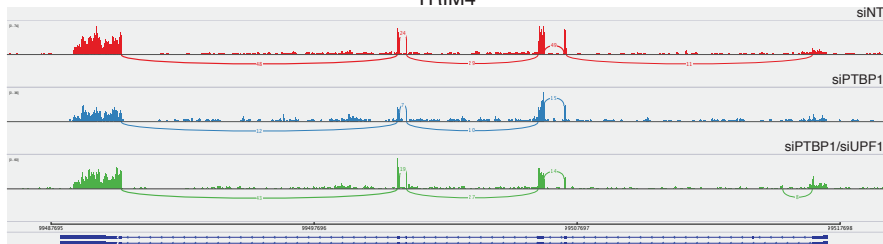

Supplement: supp [file elife-11155-supp-v1.zip]

A

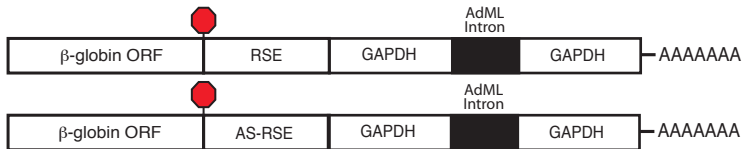

B

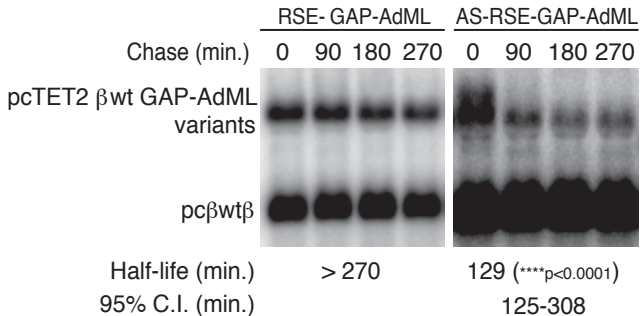

Supplement: supp [file elife-11155-supp-v1.zip]

A

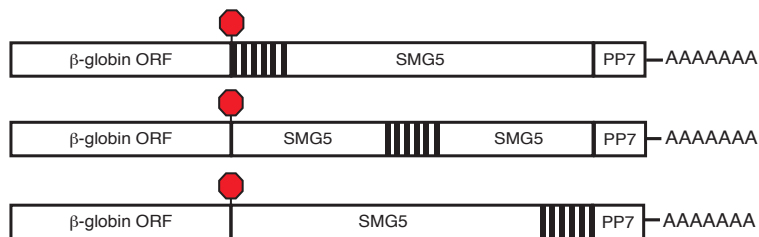

B

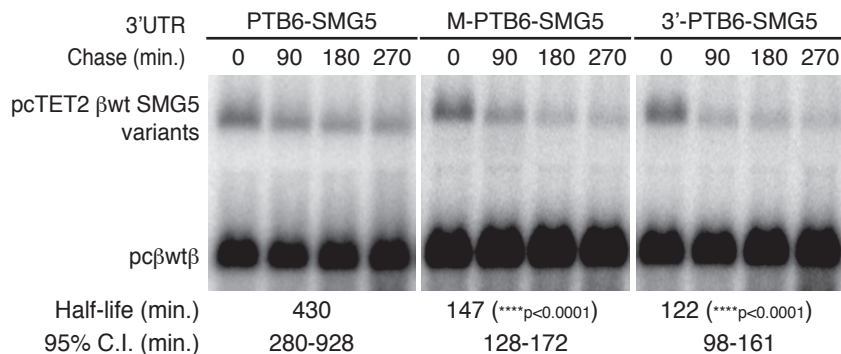

C

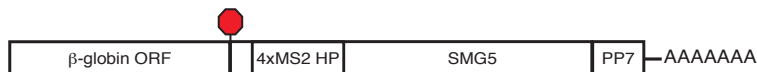

D

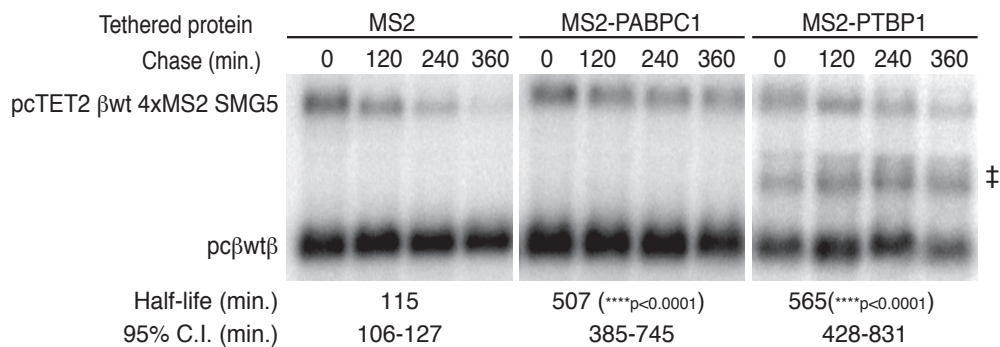

Supplement: supp [file elife-11155-supp-v1.zip]

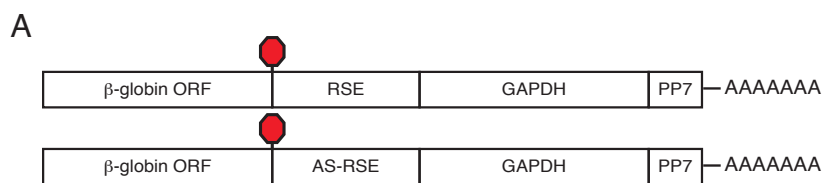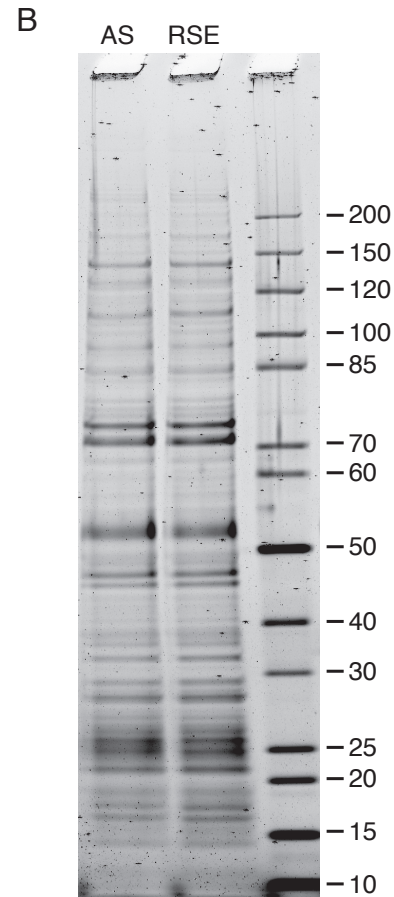

**C**

| Protein ID | RSE | Antisense RSE |
|------------|-----|---------------|
| YB-1       | 133 | 196           |
| Matrin 3   | 62  | 15            |
| hnRNP L    | 36  | 17            |
| ZAP        | 34  | 12            |
| UPF1       | 27  | 45            |
| PTBP1      | 17  | 3             |
| SFRS14     | 13  | 0             |
| RBM14      | 13  | 4             |
| G3BP2      | 9   | 1             |
| SART3      | 3   | 10            |

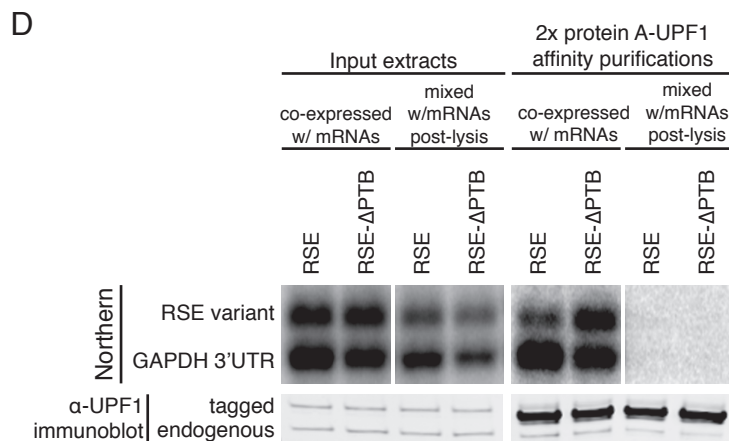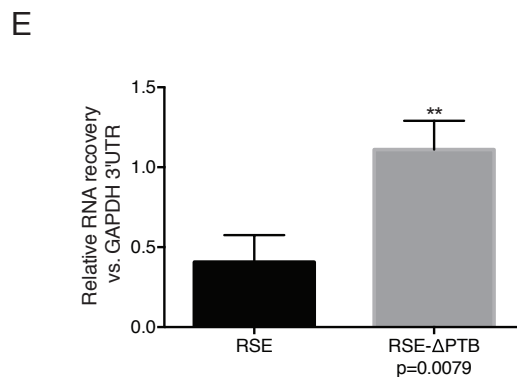

Supplement: supp [file elife-11155-supp-v1.zip]

A

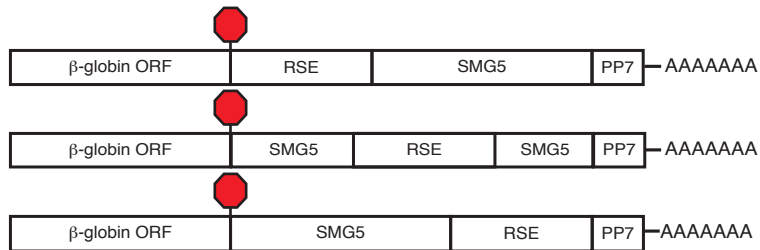

B

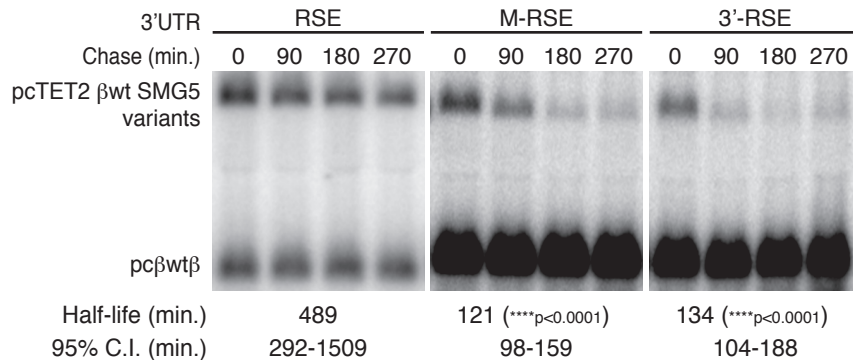

Supplement: supp [file elife-11155-supp-v1.zip]

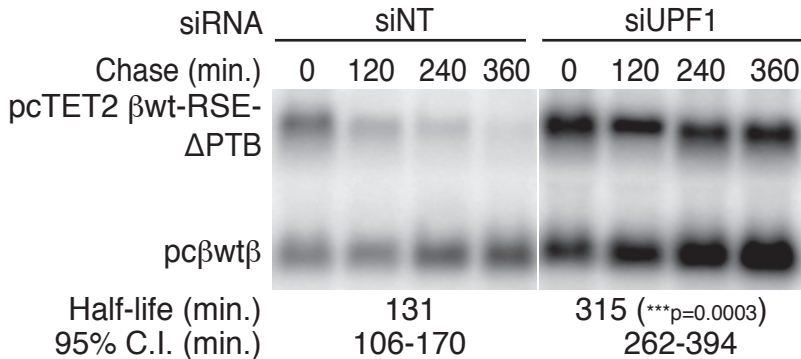

Supplement: supp [file elife-11155-supp-v1.zip]

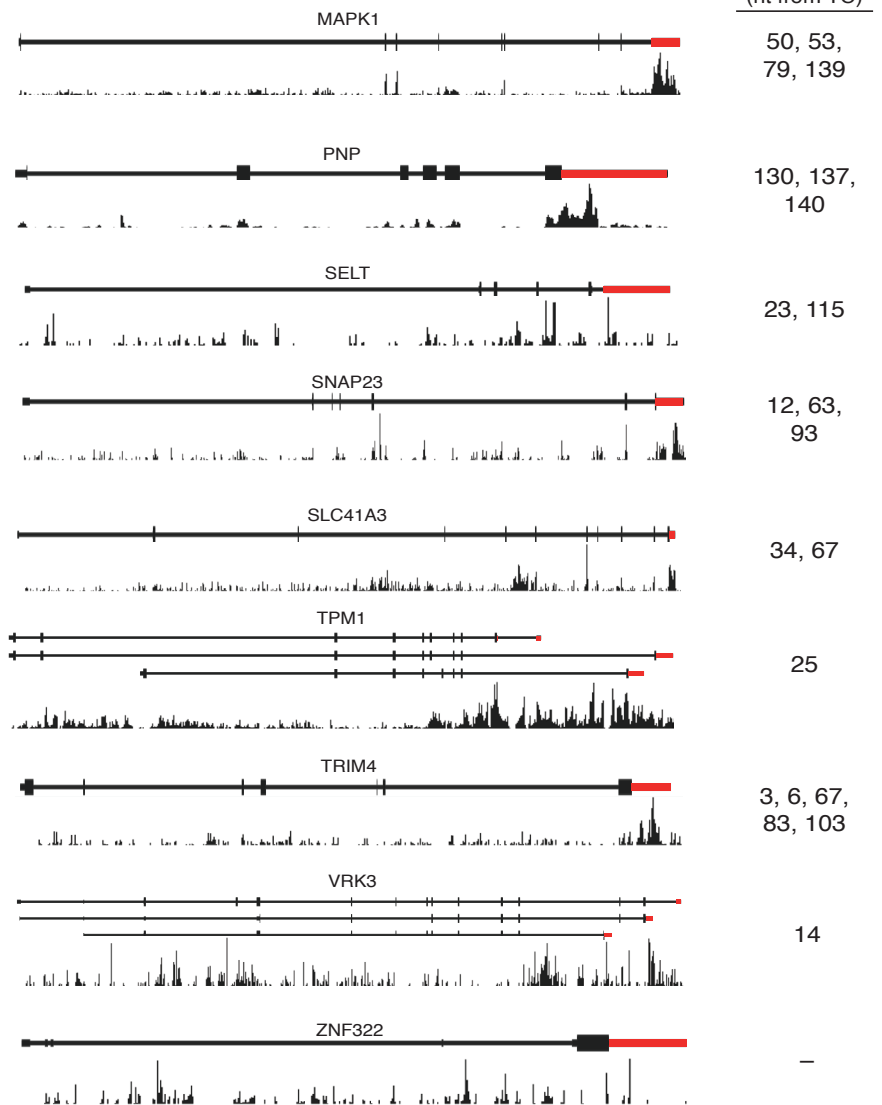

Supplement: supp [file elife-11155-supp-v1.zip]

A

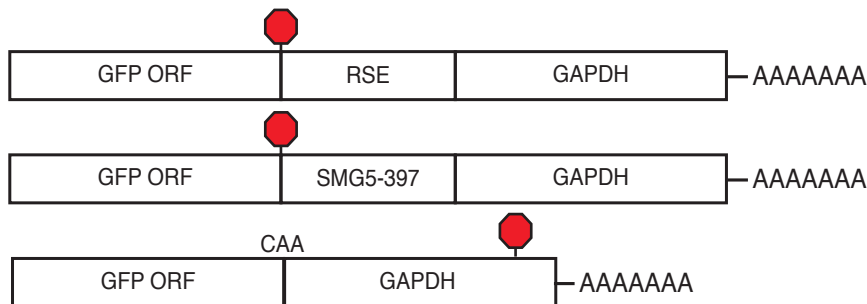

B

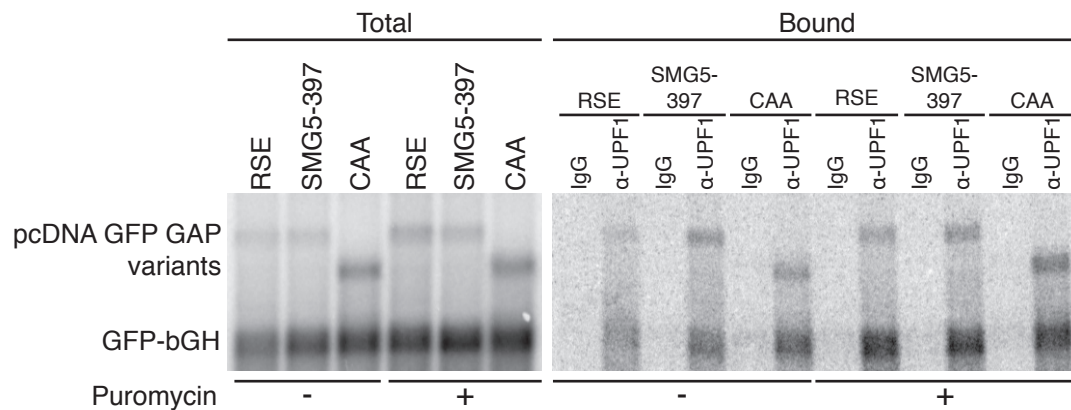

C

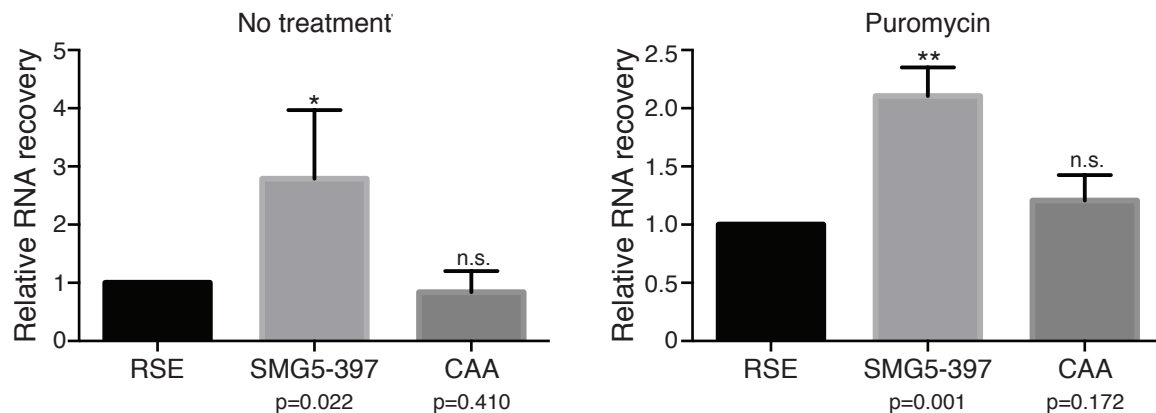

Supplement: supp [file elife-11155-supp-v1.zip]
